# Supplementary material
Source: Copernicus journal article supplement (doi:10.5194/acp-26-7895-2026)
Supplement: Supplementary file 1 [file acp-26-7895-2026-supplement.pdf]

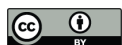

*Supplement of*

## **Comparing secondary organic aerosols schemes implemented in current chemical transport models and the policy implications of uncertainties**

**Ling Huang et al.**

*Correspondence to:* Greg Yarwood (gyarwood@ramboll.com) and Li Li (lily@shu.edu.cn)

The copyright of individual parts of the supplement might differ from the article licence.

1 **Table of Contents**

2

3 **Section S1 Parameterization of SOA scheme in different CTMs** ..... 3

4 **S1.1 CAMx** ..... 3

5 *S1.1.1 CAMx SOAP2* ..... 3

6 *S1.1.2 CAMx VBS*..... 4

7 **S1.2 CMAQ** ..... 6

8 *S1.2.1 CMAQ AERO7*..... 6

9 *S1.2.2 CMAQ CRACMM* ..... 8

10 **S1.3 GEOS-Chem** ..... 9

11 *S1.3.1 GEOS-Chem Simple scheme* ..... 10

12 *S1.3.2 GEOS-Chem Complex scheme*..... 10

13 **S1.4 CHIMERE** ..... 11

14 **S1.5 WRF-Chem** ..... 13

15 **Section S2 An example of offline calculation for the SOA yields** ..... 16

16 **Section S3 Offline calculation of SOA yields in CMAQ CRACMM**..... 17

17 **S3.1 SOA yields from benzene**..... 17

18 **S3.2 SOA yields from  $\alpha$ -pinene**..... 19

19 **Section S4. Box model configuration** ..... 21

20 **S4.1 Additional box model configuration details** ..... 21

21 **S4.2 SOA scheme fitting for CAMx box model**..... 21

22 *S4.2.1 CMAQ AERO7 and CRACMM based schemes for CAMx*..... 22

23 *S4.2.2 Simple scheme for CAMx* ..... 24

24 **Section S5. Additional figures and tables** ..... 27

25 **References**..... 32

26

27

28 No. of pages: 35

29 No. of tables: 23

30 No. of figures: 5

|    |                                                                                 |
|----|---------------------------------------------------------------------------------|
| 31 | List of Abbreviations                                                           |
| 32 | ALK4 Alkanes $5 \times 10^3 < k_{OH} < 1 \times 10^4$ (lumped class)            |
| 33 | ALK5 Alkanes $1 \times 10^4 < k_{OH}$ (lumped class)                            |
| 34 | ARO1 Aromatics $k_{OH} < 2 \times 10^4$ (lumped class)                          |
| 35 | ARO2 Aromatics $k_{OH} > 2 \times 10^4$ (lumped class)                          |
| 36 | ASOA SOA formed from AVOC                                                       |
| 37 | AVOC Anthropogenic VOC                                                          |
| 38 | BENZ Benzene (explicit)                                                         |
| 39 | BSOA SOA formed from BVOC                                                       |
| 40 | BVOC Biogenic VOC                                                               |
| 41 | CG Condensable gases                                                            |
| 42 | CTM Chemical transport model                                                    |
| 43 | HUMULE Humulene (lumped sesquiterpenes class)                                   |
| 44 | ISOP Isoprene (explicit)                                                        |
| 45 | IVOC Intermediate volatility organic compounds                                  |
| 46 | IV-SOA SOA formed from IVOC                                                     |
| 47 | LIMO Limonene (lumped class)                                                    |
| 48 | OA Organic aerosol                                                              |
| 49 | OLE1 Alkenes $k_{OH} < 7 \times 10^4$ (lumped class)                            |
| 50 | OLE2 Alkenes $k_{OH} > 7 \times 10^3$ (lumped class)                            |
| 51 | POA Primary organic aerosol                                                     |
| 52 | PM <sub>2.5</sub> Particulate matter with a diameter of 2.5 micrometers or less |
| 53 | SESQ Sesquiterpenes (lumped class)                                              |
| 54 | SOA Secondary organic aerosol                                                   |
| 55 | SVOC Semivolatile organic compounds                                             |
| 56 | TERP Terpenes (lumped class)                                                    |
| 57 | TOL Toluene (lumped class)                                                      |
| 58 | VOC Volatile organic compounds                                                  |
| 59 | VBS Volatility basis set                                                        |
| 60 | XYL Xylenes (lumped class)                                                      |

## 61 **Section S1 Parameterization of SOA scheme in different CTMs**

### 62 **S1.1 CAMx**

63 The Comprehensive Air quality Model with Extensions (CAMx; Emery et al., 2024)  
64 is an Eulerian CTM developed and distributed by Ramboll and version 7.20 was  
65 released on May 2<sup>nd</sup>, 2022 (<https://www.camx.com/>, accessed on Feb 15<sup>th</sup>, 2024).

66 CAMx provides two options to simulate SOA chemistry/partitioning: a “two-product”  
67 semi-volatile equilibrium scheme called SOAP (Strader et al., 1999) and a hybrid  
68 1.5-dimension volatility basis set (1.5-D VBS) approach (Koo et al., 2014). The  
69 former is compatible with advanced probing tools, including the Particulate Source  
70 Apportionment Technology (PSAT) and the decoupled direct method (DDM), while  
71 the latter is not.

#### 72 ***S1.1.1 CAMx SOAP2***

73 In the CAMx SOAP scheme version 2 (SOAP2), POA is treated as non-volatile and  
74 does not chemically evolve. SOA formation is represented by a modified “two  
75 product” model described above (Figure 1), where gas-phase VOC and IVOC are  
76 oxidized to CGs that can condense to SOA. SOAP2 modifies the two-product  
77 scheme by adding a third product, which is considered non-volatile and always  
78 condenses to SOA. The CG products from anthropogenic and biogenic precursors  
79 have different volatilities in SOAP2. Thus, SOAP2 includes 6 product species  
80 overall, as shown in Table S1. The SOA mass yields do not differentiate between  
81 different oxidants (i.e., OH, O<sub>3</sub>, and NO<sub>3</sub>) in SOAP2 and the yield coefficients are  
82 fitted to aged SOA yields (Hodzic et al., 2016). Therefore, no further aging is  
83 included in SOAP2. However, SOA is destroyed in the particle phase by photolysis  
84 at a rate of 0.1%×J<sub>NO2</sub> (NO<sub>2</sub> photolysis rate). Aqueous-phase formation of  
85 non-volatile SOA from glyoxal and methylglyoxal is also included with SOAP2.

86 **Table S1** Parameters for SOA formation in CAMx SOAP2 modified two-product  
 87 scheme (adapted from Table 5-5 of Ramboll, 2022)

| <i>SOA mass-based yields (g/g) from anthropogenic precursors under low (top) / high (bottom) NOx conditions</i> |       |       |       |
|-----------------------------------------------------------------------------------------------------------------|-------|-------|-------|
| C* [ $\mu\text{g}/\text{m}^3$ ] @ 300K                                                                          | 0     | 0.31  | 14    |
| CG/SOA MW [g/mol]                                                                                               | 220   | 150   | 160   |
| $\Delta H_{\text{vap}}$ [kJ/mol]                                                                                | -     | 147   | 116   |
| Benzene                                                                                                         | 0     | 0.167 | 0.487 |
|                                                                                                                 | 0     | 0.391 | 0.248 |
| Toluene                                                                                                         | 0.262 | 0.345 | 0.663 |
|                                                                                                                 | 0.044 | 0.293 | 0.304 |
| Xylene                                                                                                          | 0.294 | 0.306 | 0.291 |
|                                                                                                                 | 0.025 | 0.049 | 0.084 |
| IVOC                                                                                                            | 0.277 | 0.275 | 0     |
|                                                                                                                 | 0.129 | 0.225 | 0.012 |
| <i>SOA mass-based yields (g/g) from biogenic precursors under low (top) / high (bottom) NOx</i>                 |       |       |       |
| C* [ $\mu\text{g}/\text{m}^3$ ] @ 300K                                                                          | 0     | 0.45  | 26    |
| CG/SOA MW [g/mol]                                                                                               | 220   | 180   | 180   |
| $\Delta H_{\text{vap}}$ [kJ/mol]                                                                                | -     | 123   | 118   |
| Isoprene                                                                                                        | 0.011 | 0.029 | 0.156 |
|                                                                                                                 | 0     | 0.023 | 0.076 |
| Monoterpene                                                                                                     | 0.070 | 0.090 | 0.150 |
|                                                                                                                 | 0.070 | 0.045 | 0.075 |
| Sesquiterpene                                                                                                   | 0.270 | 0.400 | 0.136 |
|                                                                                                                 | 0.175 | 0.328 | 0.092 |

88 **SI.1.2 CAMx VBS**

89 The CAMx hybrid VBS approach, called 1.5-D VBS, combines the simplicity of  
 90 1-D VBS (Donahue et al. 2006; Robinson et al. 2007) with the ability to describe the  
 91 evolution of OA in both dimensions of oxidation state and volatility (Koo et al.  
 92 2014). Unlike SOAP2, CAMx 1.5-D VBS treats POA as semi-volatile, and uses two  
 93 basis sets with five volatility bins ( $C^*$  ranging from  $10^{-1}$  to  $10^3 \mu\text{g}/\text{m}^3$  at 298K) to  
 94 describe SOA formation from anthropogenic and biogenic precursors, respectively.  
 95 Gas-phase oxidation products in different bins are continuously oxidized by OH  
 96 (with a rate constant  $k_{\text{OH}}$  of  $2 \times 10^{-11} \text{ cm}^3 \text{ molecule}^{-1} \text{ s}^{-1}$ ) that move mass from higher  
 97 volatility bins to the next lower volatility bin in a step-wise manner (for example,  
 98 from  $C^*=1000 \mu\text{g}/\text{m}^3$  to  $C^*=100 \mu\text{g}/\text{m}^3$  and from  $C^*=100 \mu\text{g}/\text{m}^3$  to  $C^*=10 \mu\text{g}/\text{m}^3$ , as

99 illustrated by Figure 2b). For biogenic SOA, this step-wise aging is disabled because  
 100 over-prediction of OA in rural areas was reported (Lane et al., 2008; Murphy and  
 101 Pandis, 2009). Like SOAP2, SOA is destroyed by particle-phase photolysis at a rate  
 102 of  $0.1\% \times J_{\text{NO}_2}$ . Table S2 shows the parameters used for the CAMx 1.5-D VBS  
 103 scheme. The SOA yields from  $\text{NO}_3$ -initiated monoterpene oxidation are different  
 104 from OH-initiated oxidation and the SOA yields for monoterpenes and IVOC are  
 105  $\text{NO}_x$ -independent. CAMx 1.5-D VBS differentiates SOA yields from different  
 106 IVOC sources: gasoline engines (IVOG), diesel engines (IVOD), biomass burning  
 107 (IVOB), and other anthropogenic sources (IVOA). SOA yields for IVOD, IVOB and  
 108 IVOA are the same and we only present results for IVOA in this study.  
 109 Aqueous-phase formation of non-volatile SOA from glyoxal and methylglyoxal is  
 110 also included in the CAMx 1.5D VBS.

111 **Table S2** Parameters for SOA formation in CAMx 1.5-D VBS (values adopted  
 112 from CAMx source code)

|                                                                                         |       |       |       |       |       |
|-----------------------------------------------------------------------------------------|-------|-------|-------|-------|-------|
| $C^*$ [ $\mu\text{g}/\text{m}^3$ ] @ 298K                                               | 0     | 1     | 10    | 100   | 1000  |
| CG/SOA MW [g/mol]                                                                       | 172   | 167   | 163   | 158   | 153   |
| $\Delta H_{\text{vap}}$ [kJ/mol]                                                        | 35    | 35    | 35    | 35    | 35    |
| <i>SOA molar yield (ppm/ppm) under high (top)/low (bottom) <math>\text{NO}_x</math></i> |       |       |       |       |       |
| Benzene                                                                                 | 0     | 0.001 | 0.079 | 0.148 | 0.222 |
|                                                                                         | 0     | 0.035 | 0.108 | 0.185 | 0.268 |
| Toluene                                                                                 | 0     | 0.006 | 0.145 | 0.281 | 0.432 |
|                                                                                         | 0     | 0.006 | 0.145 | 0.437 | 0.281 |
| Xylene                                                                                  | 0     | 0.001 | 0.127 | 0.201 | 0.301 |
|                                                                                         | 0     | 0.048 | 0.195 | 0.252 | 0.364 |
| Isoprene                                                                                | 0     | 0     | 0.009 | 0.006 | 0     |
|                                                                                         | 0     | 0.004 | 0.013 | 0.006 | 0     |
| Monoterpenes                                                                            | 0     | 0.01  | 0.101 | 0.173 | 0.451 |
|                                                                                         | 0     | 0.087 | 0.077 | 0.309 | 0.54  |
| Sesquiterpenes                                                                          | 0     | 0.092 | 0.188 | 0.968 | 0.679 |
|                                                                                         | 0     | 0.092 | 0.188 | 0.968 | 0.679 |
| <i>SOA molar yield (ppm/ppm) for IVOC</i>                                               |       |       |       |       |       |
| IVOG                                                                                    | 0.022 | 0.098 | 0.373 | 0.699 | 0     |
| IVOD                                                                                    | 0.081 | 0.135 | 0.800 | 0.604 | 0     |
| IVOA                                                                                    | 0.081 | 0.135 | 0.800 | 0.604 | 0     |
| IVOB                                                                                    | 0.081 | 0.135 | 0.800 | 0.604 | 0     |
| <i>SOA molar yield (ppm/ppm) for <math>\text{NO}_3</math> oxidation</i>                 |       |       |       |       |       |
| Monoterpenes                                                                            | 0.314 | 0.029 | 0     | 0.862 | 0     |

## 113 **S1.2 CMAQ**

114 The Community Multiscale Air Quality (CMAQ) model is developed and distributed  
115 by the US Environmental Protection Agency (EPA). The version CMAQ v5.4  
116 released in October 2022 offers three SOA options: AERO7 inherited from earlier  
117 versions (Appel et al., 2021), CRACMM (Pye et al., 2023) introduced in v5.4 for the  
118 first time, and a 2D-VBS developed by Tsinghua University  
119 (<https://github.com/USEPA/CMAQ/tree/2DVBS>, accessed Feb 15<sup>th</sup>, 2024). We  
120 reviewed the first two schemes because both were developed by EPA to support air  
121 quality planning in the U.S. and elsewhere.

### 122 ***S1.2.1 CMAQ AERO7***

123 The CMAQ AERO7 introduced in version 5.3 (Appel et al. 2021) tracks SOA  
124 formation from anthropogenic VOC (benzene, alkanes, aromatics, polycyclic  
125 aromatic hydrocarbons (PAHs)), biogenic VOC (isoprene,  $\alpha$ -pinene, monoterpenes,  
126 and sesquiterpenes), and IVOC. Additionally, AERO7 accounts for in-cloud SOA  
127 formation from glyoxal and methylglyoxal and aerosol aqueous-phase SOA  
128 formation from glyoxal, methylglyoxal and isoprene epoxydiols (IEPOX). AERO7  
129 scheme employs VBS-based approaches to represent SOA yields from different  
130 precursors, with varying volatility ranges for each precursor. Table S3 to Table S5  
131 list the AERO7 SOA yields for precursors considered in this study. Specifically,  
132 AERO7 uses a VBS approach with four bins ( $C^*$  ranging from  $0.01 \mu\text{g}/\text{m}^3$  to  $100$   
133  $\mu\text{g}/\text{m}^3$  at 298K, Table S3) to represent SOA formation from anthropogenic VOC  
134 precursors (e.g., benzene, long alkanes, PAHs, Table S3) and seven bins ( $C^*$  ranging  
135 from  $0.01$  to  $10^7 \mu\text{g}/\text{m}^3$  at 298K, Table S4) for  $\alpha$ -pinene and monoterpenes. Isoprene  
136 and sesquiterpene oxidation products are parameterized with two and one  
137 semivolatile products (Table S5), respectively. IVOC in CMAQ is represented by  
138 model species pcVOC, which oxidizes with OH to form a low-volatility condensable  
139 vapor (pcSOG,  $C^*=10^{-5} \mu\text{g}/\text{m}^3$ ) with a molar yield of 1 (Murphy et al. 2017, Table  
140 S5).

141 AERO7 incorporates aging treatments for SOA that vary by precursor as detailed in

142 Table S6. SOA formed from AVOC, isoprene, and sesquiterpenes undergo  
 143 oligomerization in the particle-phase to form non-volatile SOA (as illustrated by  
 144 Figure 2d) with a static rate constant  $k_{OLIG}$  of  $9.49 \times 10^{-6} \text{ s}^{-1}$  (equivalent to a lifetime  
 145 of  $\sim 30$  hr). In contrast, no oligomerization occurs for SOA formed from OH-initiated  
 146 monoterpene oxidation, while SOA formed from  $\text{NO}_3$ -initiated monoterpene  
 147 oxidation is subject to particle-phase hydrolysis to non-volatile SOA with a rate  
 148 constant of  $9.25 \times 10^{-5} \text{ s}^{-1}$  (equivalent to a lifetime of 3 hr). Unlike CAMx, SOA  
 149 photolysis is not considered in AERO7.

150 **Table S3** Parameters for SOA formation from aromatics under high- (top row) and  
 151 low- (bottom row)  $\text{NO}_x$  conditions in CMAQ AERO7

|                                           |                  |       |       |       |
|-------------------------------------------|------------------|-------|-------|-------|
| $C^*$ [ $\mu\text{g}/\text{m}^3$ ] @ 298K | 0.01             | 1     | 10    | 100   |
| $\Delta H_{\text{vap}}$ [kJ/mol]          | 18               | 18    | 18    | 18    |
| CG/SOA MW [g/mol]                         | 198              | 179   | 169   | 158   |
| Precursor                                 | SOA molar yields |       |       |       |
| Benzene                                   | 0                | 0.034 | 0     | 0.392 |
|                                           | 0.146            | 0     | 0     | 0     |
| Toluene                                   | 0                | 0.016 | 0.051 | 0.047 |
|                                           | 0.14             | 0     | 0     | 0     |
| Xylene                                    | 0                | 0.015 | 0.023 | 0.06  |
|                                           | 0.193            | 0     | 0     | 0     |

152 **Table S4** Parameters for SOA formation from monoterpenes and  $\alpha$ -pinene in  
 153 CMAQ AERO7

|                                           |       |       |       |       |       |       |       |
|-------------------------------------------|-------|-------|-------|-------|-------|-------|-------|
| $C^*$ [ $\mu\text{g}/\text{m}^3$ ] @ 298K | 0.01  | 0.1   | 1     | 10    | 100   | 1000  | 10000 |
| $\Delta H_{\text{vap}}$ [kJ/mol]          | 102   | 91    | 80    | 69    | 58    | 47    | 36    |
| CG/SOA MW [g/mol]                         | 300   | 200   | 186   | 184   | 170   | 168   | /     |
| SOA molar yields                          | 0.040 | 0.032 | 0.032 | 0.103 | 0.143 | 0.285 | 0.160 |

154 **Table S5** Parameters for SOA formation from isoprene, sesquiterpenes, and IVOC  
 155 in CMAQ AERO7

|                                           |          |        |                |       |
|-------------------------------------------|----------|--------|----------------|-------|
| Precursor                                 | Isoprene |        | Sesquiterpenes | IVOC  |
| $C^*$ [ $\mu\text{g}/\text{m}^3$ ] @ 298K | 0.617    | 116.01 | 24.984         | 1E-05 |
| $\Delta H_{\text{vap}}$ [kJ/mol]          | 40       | 40     | 40             | 40    |
| CG/SOA MW [g/mol]                         | 132      | 133    | 273            | 170   |
| SOA mass yields                           | 0.0288   | 0.232  | 1.537          | 1.176 |

156

**Table S6** Aging effect for different SOA precursors in CMAQ AERO7

| SOA precursors         | Aging effect treatment                                                                                                                                                                                                                                   |
|------------------------|----------------------------------------------------------------------------------------------------------------------------------------------------------------------------------------------------------------------------------------------------------|
| Aromatics              | Under high-NO <sub>x</sub> conditions, oxidation products form non-volatile oligomers (AOLGA) at a rate of $9.49 \times 10^{-6} \text{ s}^{-1}$ ; under low-NO <sub>x</sub> conditions, oxidation products do not form oligomers, i.e., no aging effect. |
| Isoprene/Sesquiterpene | Aging is NO <sub>x</sub> -independent; oxidation products form non-volatile oligomers (AOLGB) at a rate of $9.49 \times 10^{-6} \text{ s}^{-1}$                                                                                                          |
| Monoterpenes           | There is no aging effect for OH and O <sub>3</sub> oxidation products; NO <sub>3</sub> oxidation products undergo hydrolysis to form a non-volatile product (AMTHYD) at a rate of $9.26 \times 10^{-5} \text{ s}^{-1}$                                   |
| IVOC                   | No aging effect                                                                                                                                                                                                                                          |

157 **SI.2.2** CMAQ CRACMM

158 The Community Regional Atmospheric Chemistry Multiphase Mechanism  
159 (CRACMM) was introduced in CMAQv5.4 (Pye et al., 2023). Unlike other SOA  
160 schemes, CRACMM partially integrates CG formation and CG aging with oxidant  
161 formation in the gas-phase chemical mechanism. Consequently, SOA formation  
162 occurs through multiple sequential reactions (as illustrated below for benzene),  
163 meaning that the SOA yield parameters are too complex to be tabulated for  
164 CRACMM in contrast to the other schemes reviewed here. CRACMM SOA  
165 formation considers a comprehensive range of reactive organic carbon (ROC)  
166 precursors, including alkane-like ROC, aromatics, furans, isoprene, monoterpenes,  
167 sesquiterpenes, glyoxal and methylglyoxal. Furthermore, CRACMM categorizes  
168 IVOC based on functional groups to aromatic IVOC, oxygenated IVOC, and alkane  
169 IVOC. Aqueous SOA formation from IEPOX, glyoxal, and methylglyoxal follow  
170 CMAQ AERO7.

171 SOA formation from the OH-initiated oxidation of benzene (BENZ in CRACMM) is  
172 shown here as an example where only the SOA-related products are identified (SR1  
173 to SR5):

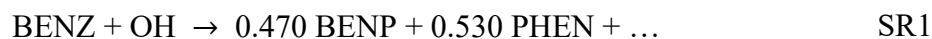

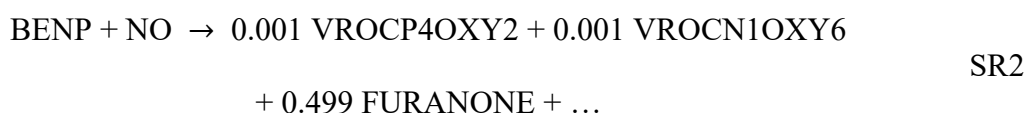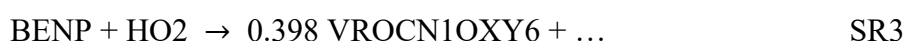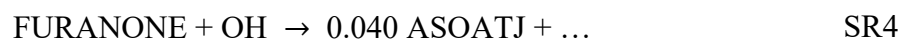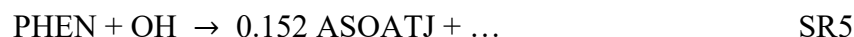

174 Non-volatile products (e.g. ASOATJ in this example) always form 100% SOA. In  
 175 contrast, semi-volatile products (e.g. VROCP4OXY2 and VROCN1OXY6) can  
 176 react further with OH in the gas-phase and undergo functionalization and/or  
 177 fragmentation within a simplified 2-D VBS. By employing a straightforward  
 178 application of linear algebra, we can multiply the stoichiometric coefficients of  
 179 sequential reaction steps (i.e., SR1 to SR5 for benzene) under both high and low  
 180 NO<sub>x</sub> conditions. This approach results in SOA yields that align closely with the  
 181 values of Pye et al. (2023) for the average of high and low NO<sub>x</sub> conditions. However,  
 182 this algebraic calculation assumes 100% reaction of the precursor and all  
 183 intermediate products, such as phenol (PHEN) and furanone. In reality, intermediate  
 184 products react sequentially with varying reaction rates (e.g., SR3 to SR7) that are  
 185 influenced by the concentrations of OH, HO<sub>2</sub> or NO. For illustration, we present  
 186 detailed calculations of aged SOA formation for CRACMM benzene and  $\alpha$ -pinene in  
 187 Section S2. As shown by these calculations, the non-aged SOA yields in CRACMM  
 188 are zero and thus were excluded from the discussion of non-aged yields in Section  
 189 4.1. As the reactions progress, however, SOA yields begin to rise, demonstrating the  
 190 importance of aging to CRACMM. Like CMAQ AERO7, SOA photolysis is not  
 191 accounted for in CRACMM.

### 192 **S1.3 GEOS-Chem**

193 GEOS-Chem is a global chemical transport model driven by meteorological input  
 194 from the Goddard Earth Observing System (GEOS) of the NASA Global Modeling  
 195 and Assimilation Office (<https://zenodo.org/records/10640536>, accessed on March  
 196 1<sup>st</sup>, 2024). GEOS-Chem is widely used for studying air quality and atmospheric

197 chemistry. Two SOA schemes are available within GEOS-Chem: a simple scheme  
198 and a complex scheme (hereafter GEOS-Chem Simple and GEOS-Chem Complex)  
199 as described by Pai et al. (2020). The former provides computationally efficient SOA  
200 estimates by treating all SOA as non-volatile and using anthropogenic CO emissions  
201 as a surrogate for all anthropogenic SOA precursor emissions. The latter implements  
202 a conventional 1-D VBS framework. The GEOS-Chem Simple scheme is interesting  
203 because it has been shown to replicate atmospheric measurements more successfully  
204 than complex schemes with many more parameters (Nault et al., 2021).

### 205 ***S1.3.1 GEOS-Chem Simple scheme***

206 The GEOS-Chem Simple scheme converts a single lumped anthropogenic SOA  
207 (ASOA) precursor to non-volatile SOA with a constant lifetime of 1 day and 100%  
208 yield. The anthropogenic precursor emissions are estimated using CO emissions as a  
209 proxy, with scaling factors of 1.3% and 6.9% for fire/biofuel and fossil fuel sources  
210 respectively. This scheme (Hodzic and Jimenez, 2011; Nault et al., 2021) was  
211 developed by comparing ambient measurements of SOA with CO, which confounds  
212 the assumed ASOA yield (100%) with the derived anthropogenic precursor emission  
213 scaling factors (1.3% or 6.9%). Consequently, we exclude the Simple scheme ASOA  
214 yields from some comparisons with other schemes presented below because the  
215 assumption of 100% yield could be considered arbitrary. SOA formation from IVOC  
216 is not explicitly considered in the GEOS-Chem Simple scheme. For BVOC, the  
217 Simple scheme assumes formation of non-volatile biogenic SOA (BSOA) with  
218 constant yields of 3% for isoprene and 10% for monoterpenes and sesquiterpenes.  
219 50% of the BSOA is formed promptly and the remaining 50% is formed with a  
220 constant lifetime of 1.15 days. The Simple scheme has no treatment of SOA aging or  
221 SOA photolysis.

### 222 ***S1.3.2 GEOS-Chem Complex scheme***

223 The GEOS-Chem complex scheme represents SOA formation from anthropogenic  
224 and biogenic precursors using a VBS framework. The SOA yields from OH and O<sub>3</sub>  
225 initiated oxidation are listed in Table S7 (Pye et al., 2010). This scheme does not  
226 include further aging processes (e.g. Figure2a) and our review of the source code

227 found no treatment of SOA photolysis. SOA formation from IVOC is simulated  
 228 using naphthalene as a proxy. Additionally, irreversible SOA formation occurs from  
 229 the aqueous-phase reactive uptake of isoprene (Marais et al., 2016), which is outside  
 230 the primary focus of the current study.

231 **Table S7** SOA yield<sup>1</sup> parameterization of GEOS-Chem Complex scheme (adopted  
 232 from Pye et al. 2010)

| C* [ $\mu\text{g}/\text{m}^3$ ]<br>@ 298K | Mass yields (g/g) under high (top)/low (bottom) NOx conditions |      |        |        |        | $\Delta H_{\text{vap}}$<br>[kJ/mol] |
|-------------------------------------------|----------------------------------------------------------------|------|--------|--------|--------|-------------------------------------|
|                                           | Non-volatile                                                   | 0.1  | 1      | 10     | 100    |                                     |
| ISOP                                      | 0                                                              | 0    | 0.0306 | 0.0000 | 0.0945 | 42                                  |
| MTPA <sup>2</sup>                         | 0                                                              | 0.04 | 0.0095 | 0.0900 | 0.0150 | 42                                  |
|                                           | 0                                                              | 0.08 | 0.0190 | 0.1800 | 0.0300 |                                     |
| LIMO                                      | 0                                                              | 0    | 0.4743 | 0.1174 | 1.4190 | 42                                  |
|                                           | 0                                                              | 0    | 0.3661 | 0.3214 | 0.8168 |                                     |
| SESQ                                      | 0                                                              | 0    | 0.0005 | 1.1463 | 2.9807 | 42                                  |
|                                           | 0                                                              | 0    | 0.0000 | 0.5738 | 1.4893 |                                     |
| BENZ                                      | 0                                                              | 0    | 0.0778 | 0.0000 | 0.7932 | 42                                  |
|                                           | 0.37                                                           | 0    | 0.0000 | 0.0000 | 0.0000 |                                     |
| TOL                                       | 0                                                              | 0    | 0.0315 | 0.0944 | 0.0800 | 42                                  |
|                                           | 0.30                                                           | 0    | 0      | 0.0000 | 0.0000 |                                     |
| XYL                                       | 0                                                              | 0    | 0.0250 | 0.0360 | 0.0899 | 42                                  |
|                                           | 0.36                                                           | 0    | 0      | 0.0000 | 0.0000 |                                     |
| IVOC <sup>3</sup>                         | 0                                                              | 0    | 0.0390 | 0.2960 | 0.2350 | 42                                  |
|                                           | 0.73                                                           | 0    | 0      | 0.0000 | 0.0000 |                                     |

233 <sup>1</sup>SOA yield for OH and O<sub>3</sub> oxidation. SOA yields from NO<sub>3</sub> oxidation with isoprene  
 234 and terpenes are not presented in this table.

235 <sup>2</sup>  $\alpha$ -pinene and similar monoterpenes

236 <sup>3</sup> Use naphthalene as a proxy

## 237 S1.4 CHIMERE

238 CHIMERE is an Eulerian chemistry-transport model widely used for operational  
 239 regional air quality forecasts (Honore et al. 2008) and research in Europe (Beekmann  
 240 and Vautard, 2010; Sciare et al., 2010) as well as other regions of the world (Zhang  
 241 et al., 2012; Hodzic et al., 2009, 2010; Ma et al., 2019). Version v2023r1 was  
 242 released in December 2023. Within CHIMERE, three SOA formation schemes are  
 243 available: single-step oxidation, the Hydrophilic/Hydrophobic Organics (H<sub>2</sub>O)  
 244 mechanism (Couvidat et al., 2018), and a VBS scheme (Zhang et al., 2013;  
 245 Cholakian et al., 2018). The VBS scheme includes two subsets: one involving only

246 functionalization and the other involving functionalization, fragmentation, and  
247 oligomerization (Zhang et al. 2013; Shrivastava et al. 2015).

248 We reviewed the CHIMERE VBS scheme with functionalization, fragmentation, and  
249 oligomerization processes, referred to as CHIMERE VBS. This scheme models SOA  
250 precursors using the SAPRC99 VOC lumping scheme (Luecken et al., 2008) and  
251 four VBS bins ( $C^*$  ranging 1 to  $10^3 \mu\text{g}/\text{m}^3$  at 298K) with corresponding SOA mass  
252 yields listed in Table S8 (Zhang et al. 2013; CHIMERE, 2023). The aging processes  
253 for AVOC and BVOC are slightly different in CHIMERE VBS but basically follow  
254 Figure2c. For AVOC, the first two generations of gas-phase products undergo  
255 OH-initiated functionalization oxidation with a 7.5% mass gain to account for  
256 oxygen addition:

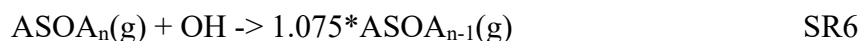

257 Subsequent generations undergo both functionalization (15% yield adjusted for  
258 oxygen mass gain) and fragmentation (75%):

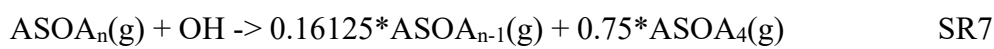

259 Subscript 4 represents the most volatile bin ( $C^*=10^3 \mu\text{g}/\text{m}^3$  at 298K). Implicitly, SR7  
260 assumes a 10% yield of volatile products such as CO or CO<sub>2</sub>. For BVOC, the  
261 fragmentation process occurs from the first generation:

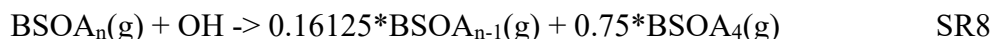

262 In the CHIMERE VBS scheme, both functionalization and fragmentation occur with  
263 an OH rate constant  $k_{\text{OH}}$  of  $1 \times 10^{-11} \text{ cm}^3 \text{ molecule}^{-1} \text{ s}^{-1}$ . Non-volatile SOA (i.e.,  
264 ANVSOA and BNVSOA) is formed by oligomerization with a rate constant  $k_{\text{OLIG}}$  of  
265  $3 \times 10^{-4} \text{ s}^{-1}$  corresponding to a lifetime of 1 hr (SR9 and SR10).

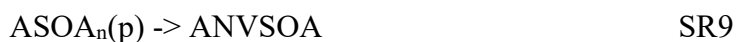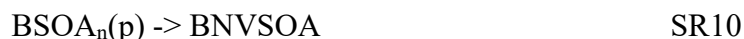

266 CHIMERE represents IVOC using three high volatility bins of the POA VBS (POA7  
267 to POA9, corresponding to  $C^* = 10^4$  to  $10^6 \mu\text{g}/\text{m}^3$ ). The IVOC mass fraction  
268 assigned to each bin is 24%, 29%, and 47% (Zhang et al. 2013). The gas-phase  
269 fraction of each volatility bin undergoes OH-initiated oxidation to form oxidized

270 POA (OPOA) with lower and/or higher volatility. Similar to ASOA formation, the  
 271 first two generations of IV-SOA (SOA formed from IVOC) undergo only  
 272 functionalization reactions (with a 7.5% mass gain, SR11) while subsequent  
 273 generations undergo both functionalization (15% goes to the next lower volatility bin)  
 274 and fragmentation (75% goes to the next higher volatility bin, SR12):

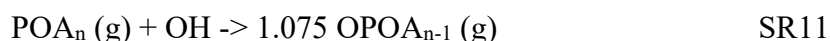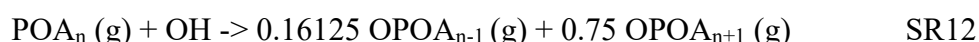

275 **Table S8** SOA yield parameterization in CHIMERE VBS (Zhang et al., 2013;  
 276 CHIMERE, 2023)

| C* [ $\mu\text{g}/\text{m}^3$ ]<br>@ 300K | Mass yields under high (top)/low (bottom)<br>NOx conditions (molar-based) <sup>2</sup> |        |        |        | $\Delta H_{\text{vap}}$<br>[kJ/mol] | CG/SOA<br>MW<br>[g/mol] |
|-------------------------------------------|----------------------------------------------------------------------------------------|--------|--------|--------|-------------------------------------|-------------------------|
|                                           | 1                                                                                      | 10     | 100    | 1000   |                                     |                         |
| ISOP                                      | 0.0003                                                                                 | 0.0225 | 0.015  | 0      | 30                                  | 180                     |
|                                           | 0.009                                                                                  | 0.03   | 0.015  | 0      |                                     |                         |
| TERP <sup>1</sup>                         | 0.012                                                                                  | 0.1215 | 0.201  | 0.507  | 30                                  | 180                     |
|                                           | 0.1073                                                                                 | 0.0918 | 0.3587 | 0.6075 |                                     |                         |
| HUMULE                                    | 0.075                                                                                  | 0.15   | 0.75   | 0.9    | 30                                  | 180                     |
|                                           | 0.075                                                                                  | 0.15   | 0.75   | 0.9    |                                     |                         |
| ARO1                                      | 0.003                                                                                  | 0.165  | 0.3    | 0.435  | 30                                  | 150                     |
|                                           | 0.075                                                                                  | 0.225  | 0.375  | 0.525  |                                     |                         |
| ARO2                                      | 0.0015                                                                                 | 0.195  | 0.3    | 0.435  | 30                                  | 150                     |
|                                           | 0.075                                                                                  | 0.3    | 0.375  | 0.525  |                                     |                         |
| ALK4                                      | 0                                                                                      | 0.0375 | 0      | 0      | 30                                  | 120                     |
|                                           | 0                                                                                      | 0.075  | 0      | 0      |                                     |                         |
| ALK5                                      | 0                                                                                      | 0.15   | 0      | 0      | 30                                  | 150                     |
|                                           | 0                                                                                      | 0.3    | 0      | 0      |                                     |                         |
| OLE1                                      | 0.0008                                                                                 | 0.0045 | 0.0375 | 0.15   | 30                                  | 120                     |
|                                           | 0.0045                                                                                 | 0.009  | 0.06   | 0.225  |                                     |                         |
| OLE2                                      | 0.003                                                                                  | 0.0225 | 0.0825 | 0.27   | 30                                  | 120                     |
|                                           | 0.0225                                                                                 | 0.0435 | 0.129  | 0.375  |                                     |                         |

277 <sup>1</sup> Same mass yields are used for APINEN, BPINEN, OCIMEN, and LIMONE. Use TERP to  
 278 represent all monoterpene species.

279 <sup>2</sup> Yields for OH and O<sub>3</sub> oxidation are the same for biogenic VOCs.

## 280 S1.5 WRF-Chem

281 WRF-Chem adds atmospheric chemistry to the Weather Research and Forecasting  
 282 (WRF) meteorological model to simulate interactions between meteorology and  
 283 atmospheric chemistry. Version v4.4 released in April 2022 offers five aerosol

284 schemes (WRF-Chem, 2022): 1) Modal Aerosol Dynamics Model for Europe  
285 (MADE/SORGAM, Schell et al. 2001), 2) Modal Aerosol Dynamics Model for  
286 Europe with the VBS (MADE/VBS), 3) Modal Aerosol Module (MAM), 4) Model  
287 for Simulating Aerosol Interactions and Chemistry (MOSAIC) sectional model  
288 aerosol parametrization, and 5) bulk aerosol module from GOCART.

289 We reviewed the MOSAIC scheme as an example of a VBS scheme with  
290 functionalization and fragmentation. In the MOSAIC scheme (Shrivastava et al.  
291 2011), SOA formation from OH-oxidation is considered but reactions with O<sub>3</sub> and  
292 NO<sub>3</sub> radicals are not included. The formation of SOA from both AVOC and BVOC  
293 is modeled using a 4-bin VBS (C\* ranging from 0.1 to 100 μg/m<sup>3</sup> at 298K) with  
294 constant yields (

295 Table **S9**). No additional aging processes are considered for the condensable gases.  
 296 SOA photolysis is included in the source code but turned off by default.  
 297 In WRF-Chem, IVOC is represented by three bins, with  $C^*$  ranging from  $10^4$  to  $10^6$   
 298  $\mu\text{g}/\text{m}^3$ . The formation of SOA from IVOC involves OH-oxidation of both the  
 299 non-oxygen (with subscript c) and oxygen parts (with subscript o), with a first-order  
 300 rate constant  $k_{\text{OH}}$  of  $4 \times 10^{-11} \text{ cm}^3 \text{ molecule}^{-1} \text{ s}^{-1}$ . For the non-oxygen part, oxidation  
 301 results in formation of non-oxygen and oxygen parts (with 15% mass gain) with  
 302 lower volatility (SR13 and SR14). At the same time, the oxygen parts oxidize with  
 303 OH and move to a lower volatility bin (SR15 and SR16). Therefore, at any time both  
 304 non-oxygen and oxygen parts move to successively lower volatility bins. The lowest  
 305 volatility species ( $C^* = 0.01 \mu\text{g}/\text{m}^3$ ) are assumed to be inert and have no  
 306 fragmentation reactions.

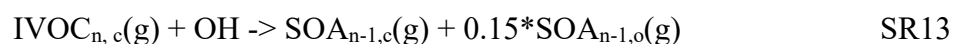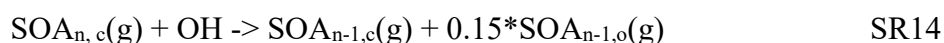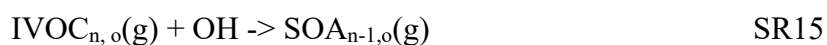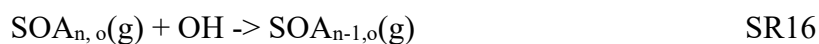

307  
308

**Table S9 SOA yield (g/g) parameterization of WRF-Chem MOSAIC (adopted from Shrivastava et al. 2011).**

| C* ( $\mu\text{g}/\text{m}^3$ ) @<br>298K | Mass yields (g/g) of each bin under high (top)/low<br>(bottom) NO <sub>x</sub> conditions |       |       |       | MW<br>[g/mol] |
|-------------------------------------------|-------------------------------------------------------------------------------------------|-------|-------|-------|---------------|
|                                           | 1                                                                                         | 10    | 100   | 1000  |               |
| ISOP                                      | 0.001                                                                                     | 0.023 | 0.015 | 0     | 250           |
|                                           | 0.009                                                                                     | 0.03  | 0.15  | 0     |               |
| TERP                                      | 0.012                                                                                     | 0.122 | 0.201 | 0.5   | 250           |
|                                           | 0.107                                                                                     | 0.092 | 0.359 | 0.6   |               |
| SESQ                                      | 0.075                                                                                     | 0.15  | 0.75  | 0.9   | 250           |
|                                           | 0.075                                                                                     | 0.15  | 0.75  | 0.9   |               |
| ARO1                                      | 0.01                                                                                      | 0.24  | 0.45  | 0.7   | 250           |
|                                           | 0.01                                                                                      | 0.24  | 0.7   | 0.7   |               |
| ARO2                                      | 0.01                                                                                      | 0.24  | 0.45  | 0.7   | 250           |
|                                           | 0.01                                                                                      | 0.24  | 0.7   | 0.7   |               |
| ALK4                                      | 0                                                                                         | 0.38  | 0     | 0     | 250           |
|                                           | 0                                                                                         | 0.075 | 0     | 0     |               |
| ALK5                                      | 0                                                                                         | 0.15  | 0     | 0     | 250           |
|                                           | 0                                                                                         | 0.3   | 0     | 0     |               |
| OLE1                                      | 0.001                                                                                     | 0.005 | 0.038 | 0.15  | 250           |
|                                           | 0.005                                                                                     | 0.009 | 0.06  | 0.225 |               |
| OLE2                                      | 0.003                                                                                     | 0.026 | 0.083 | 0.27  | 250           |
|                                           | 0.023                                                                                     | 0.044 | 0.129 | 0.375 |               |

309 **Section S2 An example of offline calculation for the SOA yields**

310 As an illustrative example, we present the calculation of non-aged SOA yields from  
311 benzene under high NO<sub>x</sub> conditions for the CAMx SOAP2 and CMAQ AERO7  
312 schemes. For CAMx SOAP2, the effective saturation concentration ( $C^* = 0.31, 14$   
313  $\mu\text{g}/\text{m}^3$ ) listed in Table S1 are defined at 300K. These values were adjusted to a  
314 standard temperature of 298 K using the Clausius-Clapeyron equation:

$$C_i^* = C_{i,0}^* \frac{T_0}{T} \exp \left[ \frac{\Delta H_i^{vap}}{R} \left( \frac{1}{T_0} - \frac{1}{T} \right) \right]$$

315 where  $C_i^*$  and  $C_{i,0}^*$  are the saturation concentrations for volatility bin  $i$  at  $T$  and  $T_0$   
316 ( $=298$  K), respectively.  $R$  is the universal gas constant, and  $\Delta H_i^{vap}$  denotes the  
317 enthalpy of vaporization for volatility bin  $i$ .

318 Subsequently, using Eq. 1 and the stoichiometric coefficients from Table S1, the  
319 SOA yield from BENZ at  $C_{OA}$  of  $10 \mu\text{g}/\text{m}^3$  was calculated as:

$$320 \quad Y = \frac{0.391}{1 + 0.21/10} + \frac{0.248}{1 + 10.31/10} = 0.505 \text{ g/g}$$

321 The CMAQ AERO7 scheme parameterizes SOA yields from BENZ using a VBS  
322 framework. The molar yields listed in Table S3 were converted to mass yields using  
323 the molecular of BENZ ( $=78.1$  g/mol) and the oxidation product. Utilizing Eq.2, the  
324 SOA yield from BENZ at  $C_{OA}$  of  $10 \mu\text{g}/\text{m}^3$  was calculated as:

$$325 \quad Y = \frac{0.0779}{1 + 1/10} + \frac{0}{1 + 10/10} + \frac{0.793}{1 + 100/10} + \frac{0}{1 + 1000/10} = 0.143 \text{ g/g}$$

326 These calculations were repeated over a  $C_{OA}$  range of  $0.1 \mu\text{g}/\text{m}^3$  to  $50 \mu\text{g}/\text{m}^3$  to  
327 generate the yield curves presented in Figure 3. A spreadsheet demonstrating these  
328 example calculations is available at <https://doi.org/10.5281/zenodo.16757660>.  
329 Calculation data for other species and schemes are available from the corresponding  
330 authors upon request.

331 **Section S3 Offline calculation of SOA yields in CMAQ CRACMM**

332 In this section, we show how SOA yields from benzene and  $\alpha$ -pinene are calculated  
333 under high and low NO<sub>x</sub> conditions in CMAQ CRACMM. All the relevant reactions  
334 and parameters (Table S10) are obtained from Table B1 and Table S1 of Pye et al. (2023).

336 **S3.1 SOA yields from benzene**

337 Under high-NO<sub>x</sub> conditions, the following reactions take place that form SOA from  
338 benzene (BENZ). For clarity, only the relevant species involved in SOA formation  
339 are listed.

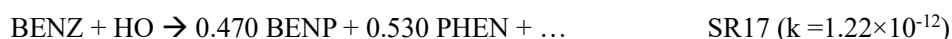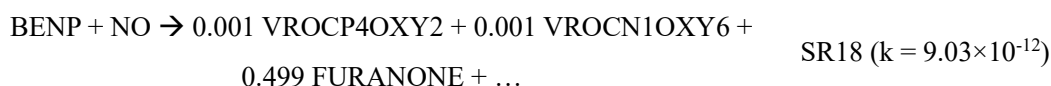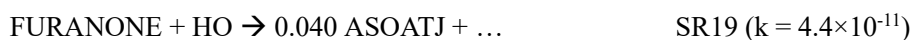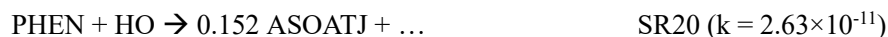

340 Under low-NO<sub>x</sub> condition, SOA formation from BENZ follows the following  
341 reactions:

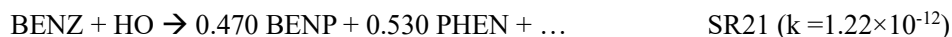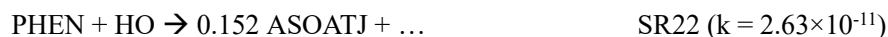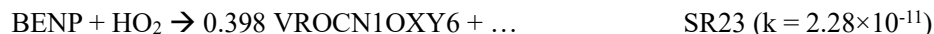

342 In our calculation, we assumed [OH]= $3.0 \times 10^6$  molecules/cm<sup>3</sup>, [NO]=100 ppt, and  
343 [HO<sub>2</sub>]=  $1.5 \times 10^8$  molecules/cm<sup>3</sup> (= [OH]  $\times$  50) for the calculation of reaction rates.  
344 The saturation concentration (C\*) for the species VROCP4OXY2, VROCN1OXY6  
345 and ASOATJ is 10<sup>4</sup>, 10<sup>-1</sup> and 10<sup>-9</sup>  $\mu\text{g}/\text{m}^3$ , respectively. With an ambient OA  
346 concentration (C<sub>OA</sub>) of 10  $\mu\text{g}/\text{m}^3$ , the gas fractions of the three species are 100%, 1%,  
347 and 0%. VROCP4OXY2 and VROCN1OXY6 participate in further reactions with  
348 OH, resulting in products that exhibit either increased or decreased C\*, as outlined in  
349 Table S10 below (derived from the reactions labeled under “ROCOXY” in Table B1  
350 of Pye et al. (2023)). In contrast, ASOATJ is characterized as non-volatile and  
351 non-reactive.

352 Calculations are stepped through time to simulate aging. At each time step, denoted  
353 as  $t$ , the total SOA mass is the sum of ASOATJ and the particle fraction of  
354 semi-volatile species:

$$SOA_t = [ASOATJ]_t + (f_{particle}^{VROCP4OXY2} \times [VROCP4OXY2]_t + f_{particle}^{VROCN1OXY6} \times [VROCN1OXY6]_t + f_{particle}^{VROCN1OXY1} \times [VROCN1OXY1]_t + \dots)$$

Eq. S1

Where  $f_{particle}^{species}$  is the particle fraction of each semi-volatile species and  $[species]_t$  represents the mass of species (i.e. VROCP4OXY2, VROCN1OXY6) at time  $t$ . The mass of ASOATJ at time  $t$  is further calculated as:

$$[ASOATJ]_t = [ASOATJ]_{t-1} + \sum_n \{[species]_{t-1}^j \times f_{gas}^j \cdot (1 - e^{-k_{OH}^j [OH] \Delta t}) \times \alpha_j^{ASOATJ}\} \quad \text{Eq. S2}$$

$j$  represents all the species that, when oxidized by OH, can form ASOATJ and  $\alpha_j^{ASOATJ}$  is the corresponding molar yield of ASOATJ. Similarly, the mass of semi-volatile species at time  $t$ , taking VROCP4OXY2 as an example, is calculated as:

$$[VROCP4OXY2]_t = [VROCP4OXY2]_{t-1} \times (f_{particle}^{VROCP4OXY2} + f_{gas}^{VROCP4OXY2} \cdot e^{-k_{OH} [OH] \Delta t}) + \sum_n \{[species]_{t-1}^j \times f_{gas}^j \cdot (1 - e^{-k_{OH}^j [OH] \Delta t}) \times \alpha_j^{VROCP4OXY2}\} \quad \text{Eq. S3}$$

The mass of VROCP4OXY2 at time  $t$  consists of three components: (1) the particle-phase of VROCP4OXY2 at time  $t-1$ , (2) the remaining gas-phase of VROCP4OXY2 after OH oxidation, and (3) the additional mass gained from OH oxidation of other species, characterized by molar yields as  $\alpha_j^{VROCP4OXY2}$  (as shown in

Table S10). We started the calculation from  $t=0$  to  $t=24$  hr and progress with a time step  $\Delta t$  of 0.2 hr. Figure S1a shows the SOA yields from benzene as a function of the aging time. Under both high and low NO<sub>x</sub> conditions, the SOA yields increase sharply during the initial six hours, after which the increase is negligible. With a 24-hour aging period, the SOA yield from benzene is 0.23 g/g under high NO<sub>x</sub> conditions and 0.67 g/g under low NO<sub>x</sub> conditions, respectively.

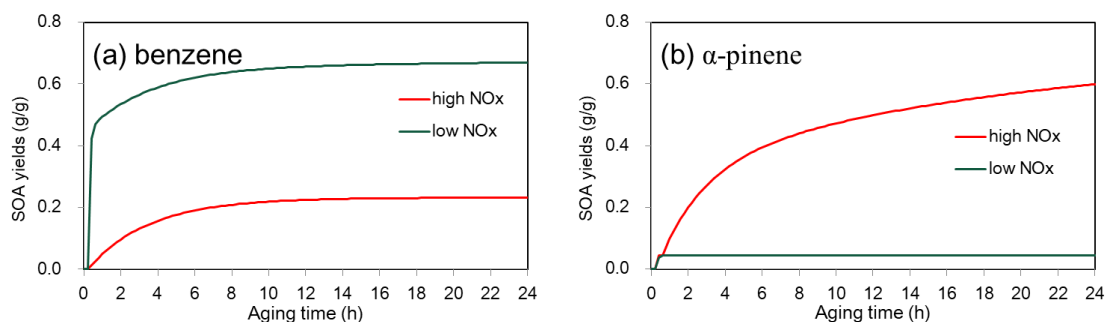

379 **Figure S1** Effect of OH-oxidation aging on SOA yield (g/g) from (a) benzene and (b)  
 380  $\alpha$ -pinene as a function of aging time in CMAQ CRACMM.

381 **Table S10** Stoichiometric yields of L/S/IVOC oxidation by OH (adopted from Table  
 382 B1 from Pye et al. 2023)

| Species                         | VROCN2<br>OXY8 | VROCN2<br>OXY4 | VROCN2<br>OXY2 | VROCN1<br>OXY6 | VROCN1<br>OXY3 | VROCN1<br>OXY1 | VROCP0<br>OXY4 | VROCP0<br>OXY2 | VROCP1<br>OXY3 | VROCP1<br>OXY1 | VROCP2<br>OXY2 | VROCP3<br>OXY2 | VROCP4<br>OXY2 | VROCP5<br>OXY1 | VROCP6<br>OXY1 | OP3      |
|---------------------------------|----------------|----------------|----------------|----------------|----------------|----------------|----------------|----------------|----------------|----------------|----------------|----------------|----------------|----------------|----------------|----------|
| C* ( $\mu\text{g}/\text{m}^3$ ) | 0.01           | 0.01           | 0.01           | 0.1            | 0.1            | 0.1            | 1              | 1              | 10             | 10             | 100            | 1000           | 10000          | 100000         | 1000000        | 10       |
| $k_{\text{OH}}$                 | 5.90E-11       | 6.07E-11       | 5.54E-11       | 5.63E-11       | 5.46E-11       | 4.50E-11       | 5.17E-11       | 4.73E-11       | 4.50E-11       | 3.80E-11       | 3.93E-11       | 3.52E-11       | 3.12E-11       | 2.40E-11       | 2.05E-11       | 4.69E-11 |
| VROCN2OXY8                      | 0.085          | 0.464          | 0.104          | 0.204          | 0.279          | 0.007          | 0.282          | 0.066          | 0.178          | 0.002          | 0.044          | 0.032          | 0.012          |                |                | 0.119    |
| VROCN2OXY4                      |                | 0.198          | 0.564          | 0.007          | 0.403          | 0.119          | 0.117          | 0.458          | 0.192          | 0.134          | 0.173          | 0.076          | 0.017          | 0.01           |                | 0.001    |
| VROCN2OXY2                      |                |                | 0.214          |                | 0.009          | 0.726          |                | 0.116          | 4.00E-04       | 0.335          | 0.01           | 0.001          |                | 0.001          |                |          |
| VROCN1OXY6                      |                | 0.012          | 0.015          |                | 0.032          | 0.012          | 0.032          | 0.033          | 0.074          | 0.008          | 0.051          | 0.053          | 0.048          | 0.009          | 0.006          | 0.039    |
| VROCN1OXY3                      |                | 0.015          | 0.03           |                | 0.008          | 0.03           | 0.018          | 0.066          | 0.045          | 0.119          | 0.112          | 0.049          | 0.025          | 0.015          | 0.005          |          |
| VROCN1OXY1                      |                |                | 0.01           |                |                | 0.007          |                | 0.005          |                | 0.076          | 0.001          |                |                |                |                |          |
| VROCP0OXY4                      |                | 0.062          | 0.019          |                | 0.019          | 0.029          | 0.001          | 0.031          | 0.063          | 0.029          | 0.134          | 0.155          | 0.088          | 0.07           | 0.022          | 0.011    |
| VROCP0OXY2                      |                |                | 0.046          |                | 0.01           | 0.045          |                | 0.002          | 0.001          | 0.077          | 0.04           | 0.015          |                | 0.015          |                |          |
| VROCP1OXY3                      |                | 0.039          | 0.031          |                | 0.051          | 0.023          |                | 0.04           | 0.001          | 0.028          | 0.051          | 0.105          | 0.092          | 0.104          | 0.05           |          |
| VROCP1OXY1                      |                |                | 0.02           |                | 0.007          | 0.035          |                | 0.021          |                | 0.012          | 0.007          | 0.001          | 0.007          | 0.003          | 0.002          |          |
| VROCP2OXY2                      |                | 0.049          | 0.046          |                | 0.051          | 0.062          | 0.066          | 0.054          | 0.023          | 0.065          | 0.024          | 0.053          | 0.097          | 0.165          | 0.088          |          |
| VROCP3OXY2                      |                | 0.04           | 0.045          |                | 0.046          | 0.052          | 0.053          | 0.052          | 0.059          | 0.071          | 0.029          | 0.009          | 0.046          | 0.157          | 0.138          |          |
| VROCP4OXY2                      |                | 0.018          | 0.045          |                | 0.051          | 0.051          | 0.025          | 0.052          | 0.065          | 0.067          | 0.073          | 0.043          | 0.002          | 0.072          | 0.146          |          |
| VROCP5OXY1                      |                |                | 0.033          |                | 0.014          | 0.035          |                | 0.037          | 0.017          | 0.042          | 0.052          | 0.058          | 0.048          | 0.006          | 0.043          |          |
| VROCP6OXY1                      |                |                | 0.037          |                |                | 0.075          |                | 0.042          |                | 0.091          | 0.059          | 0.066          | 0.074          | 0.14           | 0.096          |          |
| OP3                             |                | 0.031          | 0.003          |                |                | 0.016          |                | 0.011          | 0.015          | 0.007          | 0.004          | 0.051          | 0.061          | 0.022          | 0.032          |          |

383

### 384 S3.2 SOA yields from $\alpha$ -pinene

385 Under high-NOx conditions, the following reactions occur, leading to the formation  
 386 of SOA from  $\alpha$ -pinene (API).

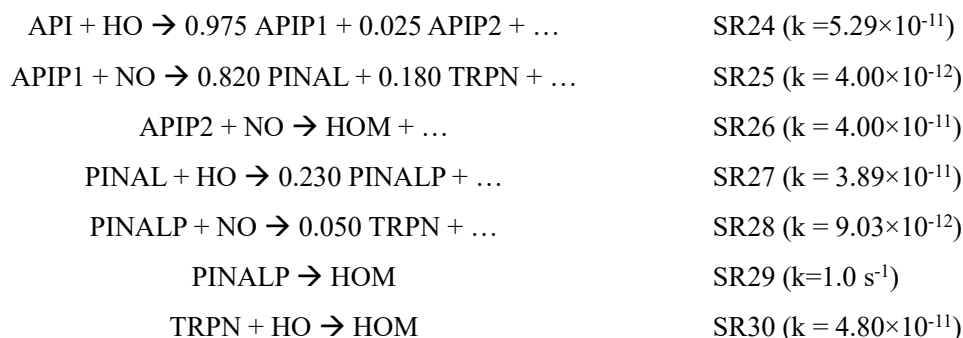

387 HOM is the final non-volatile SOA product while other products (APIP1, APIP2,  
 388 TPRN, PINAL, etc.) are all volatile. Similar to benzene case, we assumed  
 389  $[\text{OH}] = 3.0 \times 10^6$  molecules/cm<sup>3</sup>,  $[\text{NO}] = 100$  ppt, and  $[\text{HO}_2] = 1.5 \times 10^8$  molecules/cm<sup>3</sup>  
 390 ( $=[\text{OH}] \times 50$ ) for the calculation of reaction rates. The SOA mass yield, specifically  
 391 HOM, from API at time  $t$  is calculated as follows:

392

393  $SOA_t = [HOM]_{t-1} + [TRPN]_{t-1} \cdot (1 - e^{-k_{TRPN+OH} \cdot [OH] \cdot \Delta t}) \cdot \alpha_{TRPN}^{HOM} +$   
 394  $[APIP2]_{t-1} \cdot (1 - e^{-k_{APIP2+NO} \cdot [NO] \cdot \Delta t}) \cdot \alpha_{APIP2}^{HOM} + [PINALP]_{t-1} \cdot (1 - e^{-k'_{PINALP \rightarrow HOM} \cdot \Delta t}) \cdot$   
 395  $\alpha'_{PINALP \rightarrow HOM}$  Eq. S4  
 396 PINALP will either react with NO (SR28,  $k=9.03 \times 10^{-12} \text{ cm}^3 \cdot \text{molecule}^{-1} \cdot \text{s}^{-1}$ ) or  
 397 undergo auto-oxidation (SR29,  $k=1 \text{ s}^{-1}$ ). With  $[NO]=100 \text{ ppt}$ , the reaction rate of  
 398 SR28 is equal to  $0.02 \text{ s}^{-1}$ . We combine these two reactions to get:

$$k'_{PINALP \rightarrow HOM} = \frac{k_{auto-oxidation}}{k_{PINALP \rightarrow HOM} + k_{auto-oxidation}} \quad \text{Eq. S5}$$

$$\alpha'_{PINALP \rightarrow HOM} = \alpha_{auto-oxidation} \times \frac{k_{auto-oxidation}}{k_{PINALP \rightarrow HOM} + k_{auto-oxidation}} \quad \text{Eq. S6}$$

399 Figure S2a shows the yields of PINAL, TRPN, PINALP, and HOM as a function of  
 400 aging time. As expected, both PINAL and PINALP undergo rapid reactions to  
 401 produce TRPN, which subsequently leads to the formation of HOM. The SOA yields  
 402 (i.e. HOM) experiences a significant increase during the initial six hours, after which  
 403 the rate of increase becomes negligible. With a 24-hour aging period, the SOA yield  
 404 from API is 0.599 g/g under high NO<sub>x</sub> conditions.

405 Additionally, we examined the sensitivity of SOA yields after a 24-hour aging period  
 406 due to variations in NO concentration and the auto-oxidation rate. As illustrated by  
 407 Figure S2b, SOA yield remains relatively stable until  $[NO] > 1000 \text{ ppt}$ .

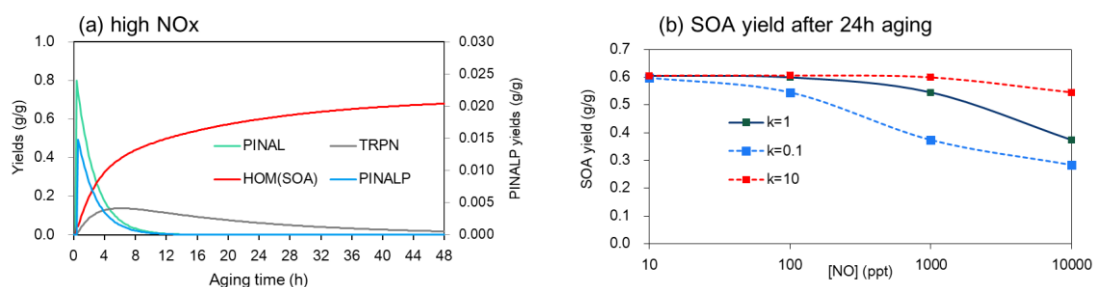

408 **Figure S2** (a) Yields of different species from API + OH as a function of aging time  
 409 under high NO<sub>x</sub> conditions and (b) sensitivity of SOA yields to different  $[NO]$  and  
 410 auto-oxidation rate.

411 Under low NO<sub>x</sub> conditions, SOA formation from API follows the following reaction:

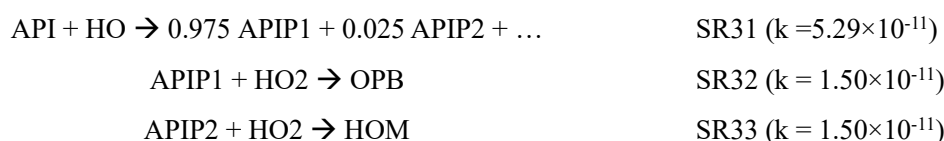

412 In this case, the SOA yield rapidly reaches a maximum value of 0.05 g/g after 1-hour

413 and stays the same afterwards (Figure S2b).

## 414 **Section S4. Box model configuration**

### 415 **S4.1 Additional box model configuration details**

416 The box model inputs and setup were developed from existing box model scenarios  
417 developed in a previous TCEQ project to compare chemical mechanisms for ozone  
418 (Ramboll, 2023). The modeling domain for the CAMx box model is 3 x 3 x 2 grid  
419 cells (in the x, y, and z dimensions). This is the smallest allowable CAMx domain  
420 since edge grid cells containing boundary conditions (BCs) are required by CAMx  
421 and 2 layers is the minimum allowed by the solution of vertical transport. All 9 grid  
422 cells in each layer have identical meteorological input data. The center grid cells of  
423 each domain, i.e. (2,2,1) and (2,2,2), form a 1-D column with layer 1 representing  
424 the planetary boundary layer (PBL) and layer 2 representing a residual layer between  
425 the PBL and the CAMx top. The PBL depth varies in time, as modeled by WRF for  
426 the TCEQ 2019 3-D CAMx modeling platform, whereas the top of layer 2 is  
427 constant in time at 3,000 m. Horizontal wind speeds in layer 1 are set to zero,  
428 preventing horizontal exchange between grid cells and ensuring BCs are not used to  
429 compute concentrations. In layer 2, there is a constant horizontal wind speed to  
430 purge the layer with a 12-hour lifetime to limit the accumulation of pollutants over  
431 time.

432 Simulations were conducted for a five-day period: September 3-7, 2019 for DFW  
433 and September 12-16, 2019 for TYL. CAMx box model input data (i.e., meteorology  
434 and initial conditions) were derived from the TCEQ 2019 3-D CAMx modeling  
435 platform. Since surface POA emissions were not included in the original model input,  
436 they were added by scaling to CO emissions using a scaling factor of 0.2. POA  
437 emissions are important because POA enhances SOA. These emissions result in  
438 average daily POA concentrations of 1.14  $\mu\text{g}/\text{m}^3$  at DFW and 0.21  $\mu\text{g}/\text{m}^3$  at Tyler.

### 439 **S4.2 SOA scheme fitting for CAMx box model**

440 We implement four SOA schemes (i.e., CAMx SOAP2, CMAQ AERO7, CMAQ  
441 CRACMM, SIMPLE) in box model scenarios. While parameters of the existing  
442 CAMx SOAP2 can be directly adopted, the other three schemes need to develop

443 SOA yields that match with the SOAP2 structure. Development of these  
 444 SOAP2-adjusted SOA yields for each scheme is described below.

445 ***S4.2.1 CMAQ AERO7 and CRACMM based schemes for CAMx***

446 The analysis of SOA yields as a function of ambient OA concentration ( $C_{OA}$ )  
 447 (performed in Section S2 and S3) was leveraged to develop SOA schemes for CAMx  
 448 that are similar to CMAQ's AERO7 and CRACMM. Curves were fit to the AERO7  
 449 and CRACMM data (Figure 3-Figure 5) for each SOA precursor using the SOAP2  
 450  $C^*$  values. The molar-based SOA yields in Table S11 through Table S14 provide  
 451 good fits to the AERO7 and CRACMM data and are used in the new CAMx SOA  
 452 schemes. Figure S3 shows an example fit for monoterpenes (TERP). The  $R^2$  values  
 453 for each fit range from 0.965 to 1.000 and the relative bias ranges from -1.6% to  
 454 3.3%. Since CRACMM has different chemical pathways for isoprene compared to  
 455 CAMx, it was not possible to fit yield data. The values in Table S14 are therefore  
 456 from the Simple scheme described below.

457 **Table S11** SOA molar-based yields from anthropogenic precursors under high  
 458 (top) and low (bottom) NO<sub>x</sub> conditions for implementation of AERO7 based  
 459 scheme into CAMx SOAP2

|                                           |       |       |       |
|-------------------------------------------|-------|-------|-------|
| $C^*$ [ $\mu\text{g}/\text{m}^3$ ] @ 300K | 0     | 0.31  | 14    |
| CG/SOA MW [g/mol]                         | 220   | 150   | 160   |
| $\Delta H_{\text{vap}}$ [kJ/mol]          | -     | 18    | 18    |
| Benzene                                   | 0.131 | 0.00  | 0.00  |
|                                           | 0.004 | 0.00  | 0.187 |
| Toluene                                   | 0.126 | 0.00  | 0.00  |
|                                           | 0.00  | 0.012 | 0.092 |
| Xylene                                    | 0.174 | 0.00  | 0.00  |
|                                           | 0.005 | 0.00  | 0.064 |
| IVOC                                      | 1.00  | 0.00  | 0.00  |
|                                           | 1.00  | 0.00  | 0.00  |

460 **Table S12** SOA molar-based yields from biogenic precursors under high (top) and  
 461 low (bottom) NO<sub>x</sub> conditions for implementation of AERO7 based scheme into  
 462 CAMx SOAP2

|                                        |       |       |        |
|----------------------------------------|-------|-------|--------|
| C* [ $\mu\text{g}/\text{m}^3$ ] @ 300K | 0     | 0.45  | 26     |
| CG/SOA MW [g/mol]                      | 220   | 180   | 180    |
| $\Delta H_{\text{vap}}$ [kJ/mol]       | -     | 85    | 65     |
| Isoprene                               | 0.00  | 0.008 | 0.0038 |
|                                        | 0.00  | 0.008 | 0.0038 |
| Monoterpene                            | 0.031 | 0.038 | 0.166  |
|                                        | 0.031 | 0.038 | 0.166  |
| Sesquiterpene                          | 0.00  | 0.068 | 1.417  |
|                                        | 0.00  | 0.068 | 1.417  |

463 **Table S13** SOA molar-based yields from anthropogenic precursors under high  
 464 (top) and low (bottom) NO<sub>x</sub> conditions for implementation of CRACMM based  
 465 scheme into CAMx SOAP2

|                                        |       |       |       |
|----------------------------------------|-------|-------|-------|
| C* [ $\mu\text{g}/\text{m}^3$ ] @ 300K | 0     | 0.31  | 14    |
| CG/SOA MW [g/mol]                      | 220   | 150   | 160   |
| $\Delta H_{\text{vap}}$ [kJ/mol]       | -     | 89    | 81    |
| Benzene                                | 0.142 | 0.141 | 0.00  |
|                                        | 0.082 | 0.001 | 0.00  |
| Toluene                                | 0.126 | 0.160 | 0.00  |
|                                        | 0.044 | 0.00  | 0.00  |
| Xylene                                 | 0.005 | 0.304 | 0.778 |
|                                        | 0.043 | 0.002 | 0.00  |
| IVOC                                   | 0.00  | 0.117 | 0.583 |
|                                        | 0.00  | 0.190 | 0.583 |

466 **Table S14** SOA molar-based yields from biogenic precursors under high (top) and  
 467 low (bottom) NO<sub>x</sub> conditions for implementation of CRACMM based scheme into  
 468 CAMx SOAP2

|                                        |       |       |       |
|----------------------------------------|-------|-------|-------|
| C* [ $\mu\text{g}/\text{m}^3$ ] @ 300K | 0     | 0.45  | 26    |
| CG/SOA MW [g/mol]                      | 220   | 180   | 180   |
| $\Delta H_{\text{vap}}$ [kJ/mol]       | -     | 85    | 81    |
| Isoprene                               | 0.01  | 0.00  | 0.00  |
|                                        | 0.01  | 0.00  | 0.00  |
| Monoterpene                            | 0.028 | 0.00  | 0.00  |
|                                        | 0.226 | 0.00  | 0.00  |
| Sesquiterpene                          | 0.009 | 0.963 | 0.873 |
|                                        | 0.00  | 0.034 | 0.351 |

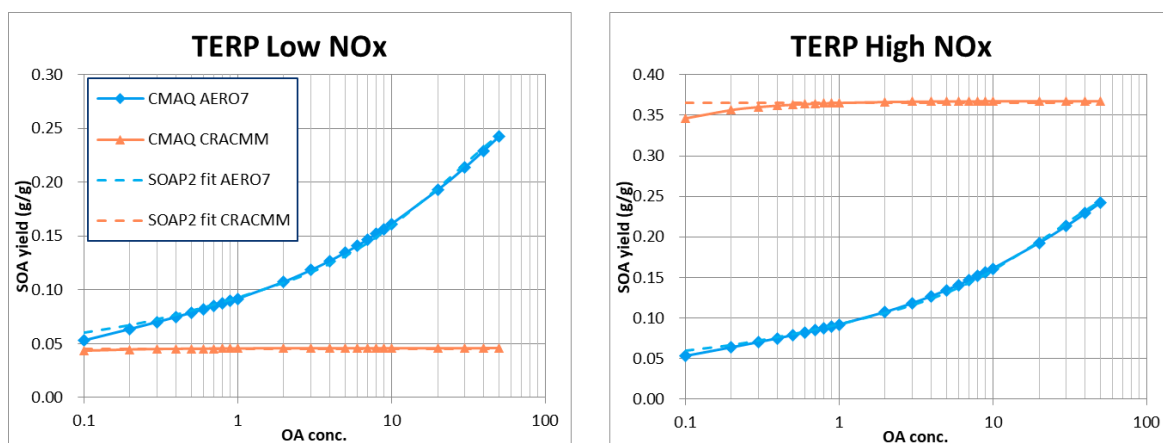

469

470 **Figure S3** SOA yields for terpenes under low and high NO<sub>x</sub> conditions for the  
 471 AERO7 and CRACMM schemes (solid lines), and the corresponding fit (dashed  
 472 lines) for the new schemes implemented in CAMx SOAP2.

#### 473 ***S4.2.2 Simple scheme for CAMx***

474 The Simple scheme assumes all SOA formed is non-volatile. This is similar to the  
 475 GEOS-Chem Simple scheme and the SOA scheme evaluated by Nault et al. (2021).  
 476 The advantages to this scheme are that it is straightforward to implement,  
 477 particularly with CAMx's source apportionment probing tools, and behaves more  
 478 predictably and without nonlinearities present in other schemes. The SOA yields for  
 479 the Simple scheme are provided in Table S15 and Table S16. The SOA yields for  
 480 biogenic precursors are based on the literature review described in Section S1. The  
 481 average SOA yield for each precursor species was calculated for an OA  
 482 concentration ( $C_{OA}$ ) of 10  $\mu\text{g}/\text{m}^3$  across different models (Table 2). 10  $\mu\text{g}/\text{m}^3$  is a  
 483 relevant  $C_{OA}$  to ambient air quality and often used as a reference for comparison. The  
 484 high NO<sub>x</sub> SOA yields for isoprene, monoterpenes, and sesquiterpenes are the  
 485 average yields from the following models/schemes: CAMx VBS, CMAQ AERO7,  
 486 CMAQ CRACMM, GEOS-Chem Complex, CHIMERE VBS, and WRF-Chem  
 487 MOSAIC. CAMx SOAP2 yields were excluded from the average since SOA aging is  
 488 assumed in the yield values. Under low NO<sub>x</sub> conditions, the multi-model average  
 489 SOA yields for the biogenic species are 25-55% larger than the high NO<sub>x</sub> yields.  
 490 Considering this and the work by Sarrafzadeh et al. (2016) and Wildt et al. (2014),  
 491 the low NO<sub>x</sub> yields in the new Simple scheme were set at 30% larger than the high  
 492 NO<sub>x</sub> yields. This ensures a similar SOA behavior for all biogenic precursors at

493 different NO<sub>x</sub> levels.  
 494 The SOA yields for anthropogenic precursors are based on work by Seltzer et al.  
 495 (2021). High NO<sub>x</sub> yields for benzene, toluene, and xylene are provided by Seltzer et  
 496 al. (2021) and the IVOC yield is calculated by averaging the yields of the 15-carbon  
 497 species (including alkanes and PAHs) since IVOC is a 15-carbon species in CAMx.  
 498 The yields for toluene and xylene are comparable to the multi-model average from  
 499 the literature review, whereas the yields for benzene and IVOC are higher than the  
 500 multi-model average. Since benzene, toluene, and xylene are all aromatic species  
 501 with similar chemistry, they should behave similarly under varying NO<sub>x</sub> conditions.  
 502 The low NO<sub>x</sub> yields are therefore assumed to be two times higher than the high NO<sub>x</sub>  
 503 yields for the aromatics. For IVOC, low NO<sub>x</sub> yields are assumed to be 30% higher  
 504 than the high NO<sub>x</sub> yields. Both scaling factors are consistent with the literature  
 505 review results.

506 **Table S15** SOA molar-based yields from anthropogenic precursors under high  
 507 (top) and low (bottom) NO<sub>x</sub> conditions for implementation of the Simple scheme  
 508 into CAMx SOAP2

|                                        |      |      |      |
|----------------------------------------|------|------|------|
| C* [ $\mu\text{g}/\text{m}^3$ ] @ 300K | 0    | 0.31 | 14   |
| CG/SOA MW [g/mol]                      | 220  | 150  | 160  |
| $\Delta H_{\text{vap}}$ [kJ/mol]       | -    | -    | -    |
| Benzene                                | 0.20 | 0.00 | 0.00 |
|                                        | 0.10 | 0.00 | 0.00 |
| Toluene                                | 0.12 | 0.00 | 0.00 |
|                                        | 0.06 | 0.00 | 0.00 |
| Xylene                                 | 0.09 | 0.00 | 0.00 |
|                                        | 0.04 | 0.00 | 0.00 |
| IVOC                                   | 1.00 | 0.00 | 0.00 |
|                                        | 1.00 | 0.00 | 0.00 |

509 **Table S16** SOA molar-based yields from biogenic precursors under high (top) and  
 510 low (bottom) NO<sub>x</sub> conditions for implementation of the Simple based scheme into  
 511 CAMx SOAP2

|                                        |      |      |      |
|----------------------------------------|------|------|------|
| C* [ $\mu\text{g}/\text{m}^3$ ] @ 300K | 0    | 0.45 | 26   |
| CG/SOA MW [g/mol]                      | 220  | 180  | 180  |
| $\Delta H_{\text{vap}}$ [kJ/mol]       | -    | -    | -    |
| Isoprene                               | 0.01 | 0.00 | 0.00 |
|                                        | 0.01 | 0.00 | 0.00 |
| Monoterpene                            | 0.10 | 0.00 | 0.00 |
|                                        | 0.07 | 0.00 | 0.00 |
| Sesquiterpene                          | 0.40 | 0.00 | 0.00 |
|                                        | 0.32 | 0.00 | 0.00 |

512 **Table S17** Initial and aged SOA yields (g/g) for CMAQ CRACMM IVOC types at  
 513 298 K and C<sub>OA</sub> of 10  $\mu\text{g}/\text{m}^3$ . The aging effect is for 24-hour exposure to OH  
 514 concentration of  $3 \times 10^6$  molecules/cm<sup>3</sup>.

| SOA yield | NO <sub>x</sub> condition | Alkane IVOC <sup>1</sup> | Emitted oxygenated IVOC | Aromatic IVOC <sup>1</sup> | Average <sup>1</sup> |
|-----------|---------------------------|--------------------------|-------------------------|----------------------------|----------------------|
| Initial   | High                      | 0.296                    | 0.121                   | 0.019                      | 0.209                |
|           | Low                       | 0.245                    | 0.121                   | 0.035                      | 0.183                |
| Aged      | High                      | 0.077                    | 0.121                   | 0.015                      | 0.099                |
|           | Low                       | 0.039                    | 0.121                   | 0.190                      | 0.080                |

515 <sup>1</sup> Weighted average of ~C12 (ROCP6ALK), ~C14 (ROCP5ALK), ~C18 (ROCP4ALK), and  
 516 ~C21 (ROCP3ALK) IVOC yields. Weighting factors for each IVOC category are adopted from  
 517 Table S1 of Zhang et al., (2013).

518 <sup>2</sup> Arithmetic average of less volatile (ROCP5ARO) and more volatile aromatic (ROCP6ARO)  
 519 IVOC yields.

520 <sup>3</sup>Aromatic IVOC are excluded from averaging due to disagreement with Pye et al. (2023) values.

521 **Section S5. Additional figures and tables**

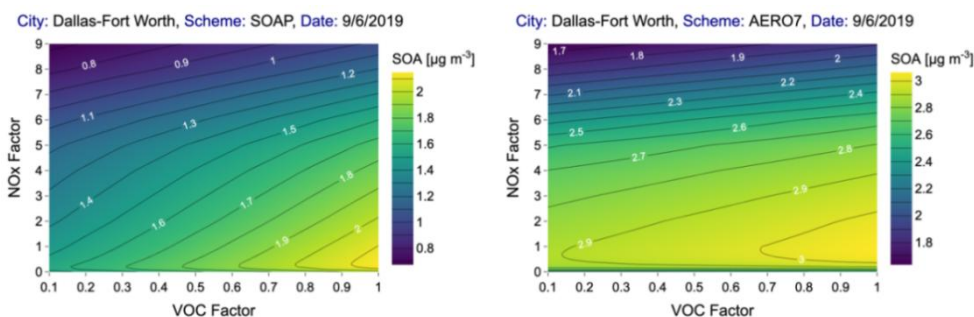

522

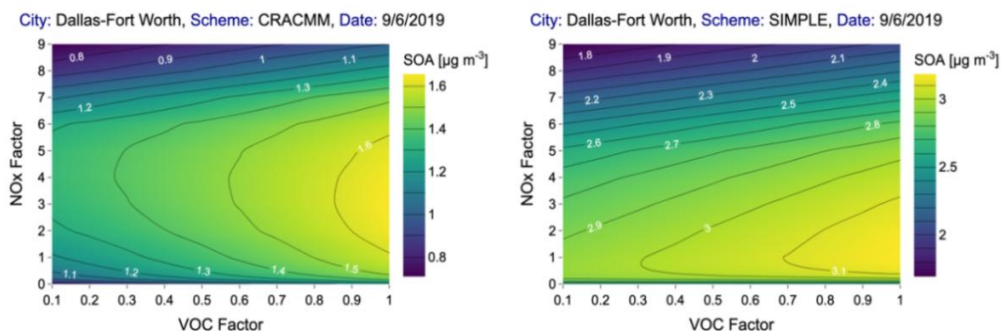

523

524 **Figure S4** SOA response surface (24-hr average,  $\mu\text{g}/\text{m}^3$ ) to varying anthropogenic  
 525 NO<sub>x</sub> and VOC emissions for DFW for four different SOA schemes. NO<sub>x</sub> and VOC  
 526 scaling factors of 1 are the base case simulation. Note that the concentration scale is  
 527 different for each scheme.

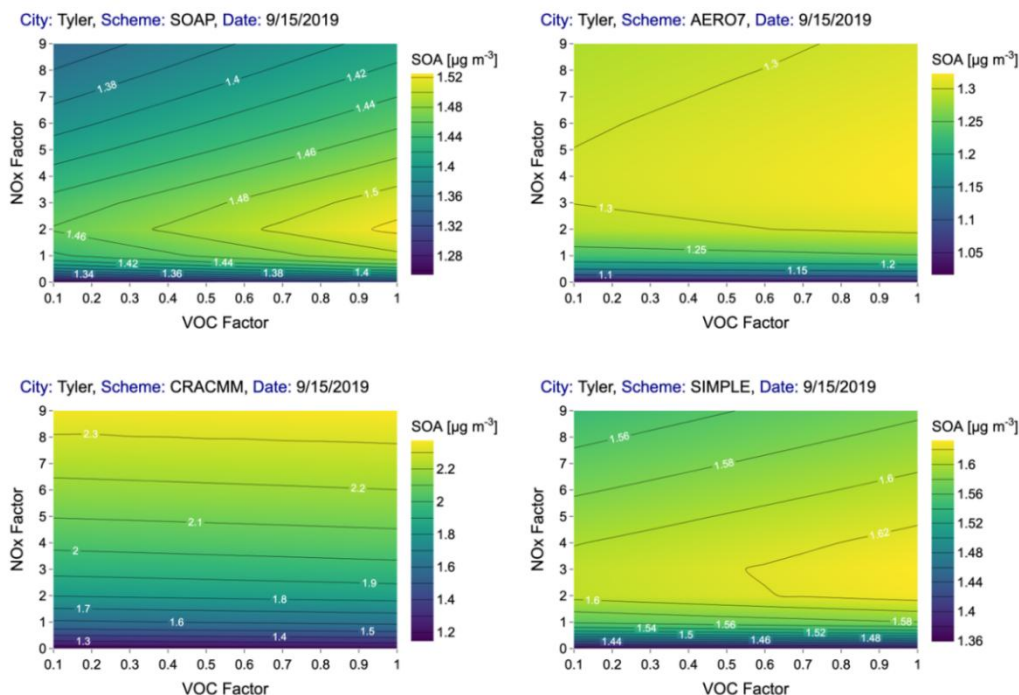

528

529

530 **Figure S5** SOA response surface (24-hr average,  $\mu\text{g}/\text{m}^3$ ) to varying anthropogenic  
 531 NO<sub>x</sub> and VOC emissions for TYL for four different SOA schemes. NO<sub>x</sub> and VOC  
 532 scaling factors of 1 are the base case simulation. Note that the concentration scale is  
 533 different for each scheme.

534 **Table S18** Ratio of non-aged high to low NO<sub>x</sub> SOA yields for different precursors in  
 535 each scheme. Values in bold italics indicate higher yields under high NO<sub>x</sub> conditions  
 536 (ref. Table 1 for specific numbers).

| Precursor | CAMx               |      | CMAQ  |        | GEOS-Chem |                    | CHIMERE | WRF-Chem |
|-----------|--------------------|------|-------|--------|-----------|--------------------|---------|----------|
|           | SOAP2              | VBS  | AERO7 | CRACMM | Simple    | Complex            | VBS     | MOSAIC   |
| BENZ      | <b><i>1.25</i></b> | 0.53 | 0.39  | /      | /         | 0.39               | 0.54    | 0.89     |
| TOL       | 0.52               | 0.90 | 0.27  | /      | /         | 0.28               | 0.54    | 0.89     |
| XYL       | 0.16               | 0.51 | 0.14  | /      | /         | 0.14               | 0.51    | 0.89     |
| IVOC      | 0.65               | 1.00 | 1.00  | /      | /         | 0.28               | 1.00    | 1.00     |
| ISOP      | 0.52               | 0.47 | 1.00  | /      | 1.00      | 1.00               | 0.53    | 0.56     |
| TERP      | 0.67               | 0.52 | 1.00  | /      | 1.00      | 0.50               | 0.53    | 0.52     |
| SESQ      | 0.74               | 1.00 | 1.00  | /      | 1.00      | <b><i>2.00</i></b> | 1.00    | 1.00     |

537 **Table S19** Ratio of aged high to low NO<sub>x</sub> SOA yields for different precursors in  
 538 each scheme. Values in bold italics indicate higher yields under low NO<sub>x</sub> conditions  
 539 (ref. Table 2 for specific numbers).

| Precursor | CAMx               |      | CMAQ  |                    | GEOS-Chem |                    | CHIMERE | WRF-Chem |
|-----------|--------------------|------|-------|--------------------|-----------|--------------------|---------|----------|
|           | SOAP2              | VBS  | AERO7 | CRACMM             | Simple    | Complex            | VBS     | MOSAIC   |
| BENZ      | <b><i>1.25</i></b> | 0.75 | 0.61  | 0.35               | /         | 0.39               | 0.71    | 0.89     |
| TOL       | 0.52               | 0.98 | 0.41  | 0.21               | /         | 0.28               | 0.71    | 0.89     |
| XYL       | 0.16               | 0.72 | 0.20  | 0.18               | /         | 0.14               | 0.68    | 0.89     |
| IVOC      | 0.65               | 1.00 | 1.00  | 0.59               | /         | 0.28               | 1.00    | 1.00     |
| ISOP      | 0.52               | 0.47 | 1.00  | /                  | 1.00      | 1.00               | 0.66    | 0.56     |
| TERP      | 0.67               | 0.52 | 1.00  | <b><i>4.30</i></b> | 1.00      | 0.50               | 0.67    | 0.52     |
| SESQ      | 0.74               | 1.00 | 1.00  | 0.51               | 1.00      | <b><i>2.00</i></b> | 1.00    | 1.00     |

540 **Table S20** Average concentrations ( $\mu\text{g}/\text{m}^3$ ) of anthropogenic SOA (ASOA) and  
 541 biogenic SOA (BSOA) over days 2 through 5 for the base and reduced NO<sub>x</sub> model  
 542 simulations. Values in bold italics indicates a decrease in SOA concentrations in the  
 543 reduced NO<sub>x</sub> model runs compared to the base runs.

|           | SOAP2                             |      |                     | AERO7                             |      |                     | CRACMM                            |      |                      | Simple                            |      |                     |
|-----------|-----------------------------------|------|---------------------|-----------------------------------|------|---------------------|-----------------------------------|------|----------------------|-----------------------------------|------|---------------------|
|           | Base 50% NO <sub>x</sub> Diff (%) |      |                     | Base 50% NO <sub>x</sub> Diff (%) |      |                     | Base 50% NO <sub>x</sub> Diff (%) |      |                      | Base 50% NO <sub>x</sub> Diff (%) |      |                     |
| DFW       |                                   |      |                     |                                   |      |                     |                                   |      |                      |                                   |      |                     |
| ASOA      | 1.34                              | 1.48 | 9.6%                | 2.34                              | 2.38 | 1.9%                | 0.78                              | 0.81 | 3.5%                 | 2.44                              | 2.45 | 0.6%                |
| BSOA      | 0.42                              | 0.48 | 12.2%               | 0.41                              | 0.42 | 0.4%                | 0.65                              | 0.59 | <b><i>-10.7%</i></b> | 0.45                              | 0.46 | 2.4%                |
| Total SOA | 1.76                              | 1.96 | 10.3%               | 2.75                              | 2.80 | 1.6%                | 1.43                              | 1.40 | <b><i>-2.5%</i></b>  | 2.88                              | 2.91 | 0.9%                |
| TYL       |                                   |      |                     |                                   |      |                     |                                   |      |                      |                                   |      |                     |
| ASOA      | 0.24                              | 0.25 | 4.4%                | 0.28                              | 0.31 | 9.9%                | 0.16                              | 0.17 | 1.0%                 | 0.30                              | 0.32 | 8.5%                |
| BSOA      | 1.19                              | 1.14 | <b><i>-4.1%</i></b> | 0.87                              | 0.82 | <b><i>-6.2%</i></b> | 1.40                              | 1.24 | <b><i>-12.6%</i></b> | 1.19                              | 1.14 | <b><i>-4.4%</i></b> |
| Total SOA | 1.43                              | 1.40 | <b><i>-2.5%</i></b> | 1.16                              | 1.14 | <b><i>-1.8%</i></b> | 1.56                              | 1.41 | <b><i>-11.0%</i></b> | 1.49                              | 1.46 | <b><i>-1.5%</i></b> |

544 **Table S21** Ratio of aged SOA yields (Table 3) to non-aged SOA yields (Table 2)  
 545 from different precursors simulated by different schemes. Bold font values indicate  
 546 no aging processes implemented.

| Precursor-<br>NOx case | CMx <sup>1</sup><br>SP2 | CMx<br>VBS | CMQ<br>AE7 | CMQ<br>CRM <sup>1</sup> | G-C<br>Spl | G-C<br>Cpx | CMR<br>VBS | W-C<br>MOS | Avg <sup>2</sup> |
|------------------------|-------------------------|------------|------------|-------------------------|------------|------------|------------|------------|------------------|
| BENZ-high              | <b>1.0</b>              | 6.9        | 1.6        | /                       | <b>1.0</b> | <b>1.0</b> | 4.1        | <b>1.0</b> | 2.4              |
| BENZ-low               | <b>1.0</b>              | 4.9        | <b>1.0</b> | /                       | <b>1.0</b> | <b>1.0</b> | 3.1        | <b>1.0</b> | 1.9              |
| TOL-high               | <b>1.0</b>              | 6.9        | 1.5        | /                       | <b>1.0</b> | <b>1.0</b> | 4.1        | <b>1.0</b> | 2.4              |
| TOL-low                | <b>1.0</b>              | 6.3        | <b>1.0</b> | /                       | <b>1.0</b> | <b>1.0</b> | 3.1        | <b>1.0</b> | 2.1              |
| XYL-high               | <b>1.0</b>              | 6.3        | 1.5        | /                       | <b>1.0</b> | <b>1.0</b> | 3.9        | <b>1.0</b> | 2.2              |
| XYL-low                | <b>1.0</b>              | 4.4        | <b>1.0</b> | /                       | <b>1.0</b> | <b>1.0</b> | 2.9        | <b>1.0</b> | 1.8              |
| IVOC high              | <b>1.0</b>              | 2.2        | <b>1.0</b> | /                       | /          | <b>1.0</b> | 60         | 4448       | 645              |
| IVOC-low               | <b>1.0</b>              | 2.2        | <b>1.0</b> | /                       | /          | <b>1.0</b> | 60         | 4448       | 645              |
| ISOP-high              | <b>1.0</b>              | <b>1.0</b> | 1.3        | /                       | <b>1.0</b> | <b>1.0</b> | 2.3        | <b>1.0</b> | 1.2              |
| ISOP-low               | <b>1.0</b>              | <b>1.0</b> | 1.3        | /                       | <b>1.0</b> | <b>1.0</b> | 1.8        | <b>1.0</b> | 1.2              |
| TERP-high              | <b>1.0</b>              | <b>1.0</b> | <b>1.0</b> | /                       | <b>1.0</b> | <b>1.0</b> | 4.1        | <b>1.0</b> | 1.4              |
| TERP-low               | <b>1.0</b>              | <b>1.0</b> | <b>1.0</b> | /                       | <b>1.0</b> | <b>1.0</b> | 3.2        | <b>1.0</b> | 1.3              |
| SESQ-high              | <b>1.0</b>              | <b>1.0</b> | 1.8        | /                       | <b>1.0</b> | <b>1.0</b> | 4.2        | <b>1.0</b> | 1.6              |
| SESQ-low               | <b>1.0</b>              | <b>1.0</b> | 1.8        | /                       | <b>1.0</b> | <b>1.0</b> | 4.2        | <b>1.0</b> | 1.6              |

547 <sup>1</sup> Ratio for CRACMM is not applicable as the initial SOA yields are zero.

548 <sup>2</sup> Excluding CRACMM.

549  
550  
551

**Table S22** Ranking (from lowest to highest) initial SOA yields from different precursors by each scheme under high and low NO<sub>x</sub> conditions (ref. Table 2 for specific numbers)

| Ranking                               | CAMx SOAP2 | CAMx VBS | CMAQ AERO7 | CMAQ CRAMM | GOES-Chem Simple | GEOS-Chem Complex | CHIMERE VBS | WRF-Chem MOSAIC |
|---------------------------------------|------------|----------|------------|------------|------------------|-------------------|-------------|-----------------|
| <i>High NO<sub>x</sub> conditions</i> |            |          |            |            |                  |                   |             |                 |
| 1                                     | ISOP       | ISOP     | ISOP       |            | ISOP             | ISOP              | IVOC        | IVOC            |
| 2                                     | Xylene     | TERP     | Xylene     |            | TERP             | Xylene            | ISOP        | ISOP            |
| 3                                     | TERP       | Benzene  | Toluene    |            | SESQ             | Toluene           | TERP        | TERP            |
| 4                                     | IVOC       | Xylene   | Benzene    |            |                  | TERP              | Xylene      | Benzene         |
| 5                                     | Toluene    | Toluene  | TERP       |            |                  | Benzene           | Benzene     | Toluene         |
| 6                                     | Benzene    | SESQ     | SESQ       |            |                  | IVOC              | Toluene     | Xylene          |
| 7                                     | SESQ       | IVOC     | IVOC       |            |                  | SESQ              | SESQ        | SESQ            |
| <i>Low NO<sub>x</sub> conditions</i>  |            |          |            |            |                  |                   |             |                 |
| 1                                     | ISOP       | ISOP     | ISOP       |            | ISOP             | ISOP              | IVOC        | IVOC            |
| 2                                     | TERP       | TERP     | TERP       |            | TERP             | TERP              | ISOP        | ISOP            |
| 3                                     | Benzene    | Toluene  | Toluene    |            | SESQ             | Toluene           | SESQ        | TERP            |
| 4                                     | IVOC       | SESQ     | Xylene     |            |                  | Xylene            | TERP        | Benzene         |
| 5                                     | SESQ       | Benzene  | Benzene    |            |                  | Benzene           | Xylene      | Toluene         |
| 6                                     | Xylene     | Xylene   | SESQ       |            |                  | SESQ              | Benzene     | Xylene          |
| 7                                     | Toluene    | IVOC     | IVOC       |            |                  | IVOC              | Toluene     | SESQ            |

552

553  
554  
555

**Table S23** Ranking (from lowest to highest) aged SOA yields from different precursors by each scheme under high and low NO<sub>x</sub> conditions (ref. Table 3 for specific numbers)

| Ranking                               | CAMx SOAP2 | CAMx VBS | CMAQ AERO7 | CMAQ CRAMM | GOES-Chem Simple | GEOS-Chem Complex | CHIMERE VBS | WRF-Chem MOSAIC |
|---------------------------------------|------------|----------|------------|------------|------------------|-------------------|-------------|-----------------|
| <i>High NO<sub>x</sub> conditions</i> |            |          |            |            |                  |                   |             |                 |
| 1                                     | ISOP       | ISOP     | ISOP       | Xylene     | ISOP             | ISOP              | IVOC        | ISOP            |
| 2                                     | Xylene     | TERP     | Xylene     | Toluene    | TERP             | Xylene            | ISOP        | TERP            |
| 3                                     | TERP       | SESQ     | Toluene    | Benzene    | SESQ             | Toluene           | TERP        | Benzene         |
| 4                                     | IVOC       | Benzene  | TERP       | IVOC       |                  | TERP              | Xylene      | Toluene         |
| 5                                     | Toluene    | Xylene   | Benzene    | SESQ       |                  | Benzene           | Benzene     | Xylene          |
| 6                                     | Benzene    | IVOC     | SESQ       | TERP       |                  | IVOC              | Toluene     | SESQ            |
| 7                                     | SESQ       | Toluene  | IVOC       |            |                  | SESQ              | SESQ        | IVOC            |
| <i>Low NO<sub>x</sub> conditions</i>  |            |          |            |            |                  |                   |             |                 |
| 1                                     | ISOP       | ISOP     | ISOP       | TERP       | ISOP             | ISOP              | IVOC        | ISOP            |
| 2                                     | TERP       | TERP     | TERP       | Toluene    | TERP             | TERP              | ISOP        | TERP            |
| 3                                     | Benzene    | SESQ     | Toluene    | Xylene     | SESQ             | Toluene           | TERP        | Benzene         |
| 4                                     | IVOC       | Benzene  | Xylene     | IVOC       |                  | Xylene            | SESQ        | Toluene         |
| 5                                     | SESQ       | Xylene   | Benzene    | Benzene    |                  | Benzene           | Xylene      | Xylene          |
| 6                                     | Xylene     | IVOC     | SESQ       | SESQ       |                  | SESQ              | Benzene     | SESQ            |
| 7                                     | Toluene    | Toluene  | IVOC       |            |                  | IVOC              | Toluene     | IVOC            |

556

557 **References**

- 558 Appel, K. W., Bash, J. O., Fahey, K. M., Foley, K. M., Gilliam, R. C., Hogrefe, C.,  
559 and Wong, D. C.: The Community Multiscale Air Quality (CMAQ) model  
560 versions 5.3 and 5.3.1: system updates and evaluation, *Geoscientific Model*  
561 *Development*, 14, 2867-2897, 2021.
- 562 Beekmann, M. and Vautard, R.: A modelling study of photochemical regimes over  
563 Europe: robustness and variability, *Atmospheric Chemistry and Physics*, 10,  
564 10067-10084, 2010.
- 565 CHIMERE Users Guide: <https://www.lmd.polytechnique.fr/chimere/>, 2023.
- 566 Cholakian, A., Beekmann, M., Colette, A., Coll, I., Siour, G., Sciare, J., and Dulac,  
567 F.: Simulation of fine organic aerosols in the western Mediterranean area  
568 during the ChArMEx 2013 summer campaign, *Atmospheric Chemistry and*  
569 *Physics*, 18, 7287-7312, 2018.
- 570 Couvidat, F., Bessagnet, B., Garcia-Vivanco, M., Real, E., Menut, L., and Colette,  
571 A.: Development of an inorganic and organic aerosol model (CHIMERE  
572 2017  $\beta$  v1.0): Seasonal and spatial evaluation over Europe, *Geoscientific*  
573 *Model Development*, 11, 165-194, 2018.
- 574 Hodzic, A. and Jimenez, J. L.: Modeling anthropogenically controlled secondary  
575 organic aerosols in a megacity: A simplified framework for global and  
576 climate models, *Geoscientific Model Development*, 4, 901-917, 2011.
- 577 Hodzic, A. and Jimenez, J. L.: Modeling anthropogenically controlled secondary  
578 organic aerosols in a megacity: A simplified framework for global and  
579 climate models, *Geoscientific Model Development*, 4, 901-917, 2011.
- 580 Hodzic, A., Jimenez, J. L., Madronich, S., Aiken, A. C., Bessagnet, B., Curci, G.,  
581 and Ulbrich, I. M.: Modeling organic aerosols during MILAGRO:  
582 application of the CHIMERE model and importance of biogenic secondary  
583 organic aerosols, *Atmospheric Chemistry and Physics Discussions*, 9,  
584 12207-12281, 2009.
- 585 Hodzic, A., Jimenez, J. L., Madronich, S., Canagaratna, M. R., DeCarlo, P. F.,  
586 Kleinman, L., and Fast, J.: Modeling organic aerosols in a megacity:  
587 potential contribution of semi-volatile and intermediate volatility primary  
588 organic compounds to secondary organic aerosol formation, *Atmospheric*  
589 *Chemistry and Physics*, 10, 5491-5514, 2010.
- 590 Hodzic, A., Kasibhatla, P. S., Jo, D. S., Cappa, C. D., Jimenez, J. L., Madronich, S.,  
591 and Park, R. J.: Rethinking the global secondary organic aerosol (SOA)  
592 budget: stronger production, faster removal, shorter lifetime, *Atmospheric*  
593 *Chemistry and Physics*, 16, 7917-7941, 2016.
- 594 Honoré, C., Rouil, L., Vautard, R., Beekmann, M., Bessagnet, B., Dufour, A., and  
595 Poisson, N.: Predictability of European air quality: Assessment of 3 years of

596 operational forecasts and analyses by the PREV'AIR system, *Journal of*  
597 *Geophysical Research: Atmospheres*, 113, 2008.

598 Koo, B., Knipping, E., and Yarwood, G.: 1.5-Dimensional volatility basis set  
599 approach for modeling organic aerosol in CAMx and CMAQ, *Atmospheric*  
600 *Environment*, 95, 158-164, 2014.

601 Lane, T. E., Donahue, N. M., and Pandis, S. N.: Simulating secondary organic  
602 aerosol formation using the volatility basis-set approach in a chemical  
603 transport model, *Atmospheric Environment*, 42, 7439-7451, 2008.

604 Luecken, D. J., Phillips, S., Sarwar, G., and Jang, C.: Effects of using the CB05 vs.  
605 SAPRC99 vs. CB4 chemical mechanism on model predictions: Ozone and  
606 gas-phase photochemical precursor concentrations, *Atmospheric*  
607 *Environment*, 42, 5805-5820, 2008.

608 Ma, S., Zhang, X., Gao, C., Tong, Q., Xiu, A., Zhao, H., and Zhang, S.: Simulating  
609 performance of CHIMERE on a late autumnal dust storm over Northern  
610 China, *Sustainability*, 11, 1074, 2019.

611 Marais, E. A., Jacob, D. J., Jimenez, J. L., Campuzano-Jost, P., Day, D. A., Hu, W.,  
612 and McNeill, V. F.: Aqueous-phase mechanism for secondary organic  
613 aerosol formation from isoprene: application to the southeast United States  
614 and co-benefit of SO<sub>2</sub> emission controls, *Atmospheric Chemistry and*  
615 *Physics*, 16, 1603-1618, 2016.

616 Murphy, B. N. and Pandis, S. N.: Simulating the formation of semivolatile primary  
617 and secondary organic aerosol in a regional chemical transport model,  
618 *Environmental Science & Technology*, 43, 4722-4728, 2009.

619 Murphy, B. N., Woody, M. C., Jimenez, J. L., Carlton, A. M. G., Hayes, P. L., Liu,  
620 S., and Pye, H. O.: Semivolatile POA and parameterized total combustion  
621 SOA in CMAQv5.2: impacts on source strength and partitioning,  
622 *Atmospheric Chemistry and Physics*, 17, 11107-11133, 2017.

623 Nault, B. A., Jo, D. S., McDonald, B. C., Campuzano-Jost, P., Day, D. A., Hu, W.,  
624 Schroder, J. C., Allan, J., Blake, D. R., Canagaratna, M. R., and Coe, H.:  
625 Secondary organic aerosols from anthropogenic volatile organic compounds  
626 contribute substantially to air pollution mortality, *Atmospheric Chemistry*  
627 *and Physics*, 21, 11201-11224, 2021.

628 Pai, S. J., Heald, C. L., Pierce, J. R., Farina, S. C., Marais, E. A., Jimenez, J. L., and  
629 Vu, K.: An evaluation of global organic aerosol schemes using airborne  
630 observations, *Atmospheric Chemistry and Physics*, 20, 2637-2665, 2020.

631 Pye, H. O. T., Chan, A. W. H., Barkley, M. P., and Seinfeld, J. H.: Global modeling  
632 of organic aerosol: the importance of reactive nitrogen (NO<sub>x</sub> and NO<sub>3</sub>),  
633 *Atmospheric Chemistry and Physics*, 10, 11261-11276, 2010.

634 Pye, H. O., Place, B. K., Murphy, B. N., Seltzer, K. M., D'Ambro, E. L., Allen, C.,  
635 and Stockwell, W. R.: Linking gas, particulate, and toxic endpoints to air

636 emissions in the Community Regional Atmospheric Chemistry Multiphase  
637 Mechanism (CRACMM), Atmospheric Chemistry and Physics, 23,  
638 5043-5099, 2023.

639 CAMx User's Guide, Version 7.20: <https://www.camx.com/download/source/>, 2024.

640 Robinson, A. L., Donahue, N. M., Shrivastava, M. K., Weitkamp, E. A., Sage, A. M.,  
641 Grieshop, A. P., and Pandis, S. N.: Rethinking organic aerosols: Semivolatile  
642 emissions and photochemical aging, *Science*, 315, 1259-1262, 2007.

643 Sarrafzadeh, M., Wildt, J., Pullinen, I., Springer, M., Kleist, E., Tillmann, R.,  
644 Schmitt, S. H., Wu, C., Mentel, T. F., Zhao, D., and Hastie, D. R.: Impact of  
645 NO<sub>x</sub> and OH on secondary organic aerosol formation from β-pinene  
646 photooxidation, *Atmospheric Chemistry and Physics*, 16, 11237-11248,  
647 2016.

648 Schell, B., Ackermann, I. J., Hass, H., Binkowski, F. S., and Ebel, A.: Modeling the  
649 formation of secondary organic aerosol within a comprehensive air quality  
650 model system, *Journal of Geophysical Research: Atmospheres*, 106,  
651 28275-28293, 2001.

652 Sciare, J., d'Argouges, O., Zhang, Q. J., Sarda-Estève, R., Gaimoz, C., Gros, V., and  
653 Sanchez, O.: Comparison between simulated and observed chemical  
654 composition of fine aerosols in Paris (France) during springtime: contribution  
655 of regional versus continental emissions, *Atmospheric Chemistry and  
656 Physics*, 10, 11987-12004, 2010.

657 Shrivastava, M., Easter, R. C., Liu, X., Zelenyuk, A., Singh, B., Zhang, K., and  
658 Tiitta, P.: Global transformation and fate of SOA: Implications of low -  
659 volatility SOA and gas - phase fragmentation reactions, *Journal of  
660 Geophysical Research: Atmospheres*, 120, 4169-4195, 2015.

661 Shrivastava, M., Fast, J., Easter, R., Gustafson Jr, W. I., Zaveri, R. A., Jimenez, J. L.,  
662 and Hodzic, A.: Modeling organic aerosols in a megacity: comparison of  
663 simple and complex representations of the volatility basis set approach,  
664 *Atmospheric Chemistry and Physics*, 11, 6639-6662, 2011.

665 Strader, R., Lurmann, F., and Pandis, S. N.: Evaluation of secondary organic aerosol  
666 formation in winter, *Atmospheric Environment*, 33, 4849-4863, 1999.

667 Wildt, J., Mentel, T. F., Kiendler-Scharr, A., Hoffmann, T., Andres, S., Ehn, M.,  
668 Kleist, E., Müsgen, P., Rohrer, F., Rudich, Y., and Springer, M.: Suppression  
669 of new particle formation from monoterpene oxidation by NO<sub>x</sub>, *Atmospheric  
670 Chemistry and Physics*, 14, 2789-2804, 2014.

671 WRF-Chem version 4.4 Users Guide:  
672 [https://ruc.noaa.gov/wrf/wrf-chem/Users\\_guide.pdf](https://ruc.noaa.gov/wrf/wrf-chem/Users_guide.pdf), 2022 .

673 Zhang, Q., Laurent, B., Velay-Lasry, F., Ngo, R., Derognat, C., Marticorena, B., and  
674 Albergel, A.: An air quality forecasting system in Beijing-Application to the

675 study of dust storm events in China in May 2008, Journal of Environmental  
676 Sciences, 24, 102-111, 2012.

677 Zhang, Q. J., Beekmann, M., Drewnick, F., Freutel, F., Schneider, J., Crippa, M.,  
678 and Perrussel, O.: Formation of organic aerosol in the Paris region during the  
679 MEGAPOLI summer campaign: evaluation of the volatility-basis-set  
680 approach within the CHIMERE model, Atmospheric Chemistry and Physics,  
681 13, 5767-5790, 2013.

682
